# Supplementary material for: Seroprevalence of COVID-19 infection in a rural district of South India: A population-based seroepidemiological study
Source: PubMed Central journal article supplement (PMC8011723; doi:10.1371/journal.pone.0249247), 2021-03-31

Seroprevalence of COVID-19 infection in a rural district of South India: a community-based cross-sectional study.  
 --Manuscript Draft--

|                                                                                      |                                                                                                                                                                                                                                                                                                                                                                                                                                                                                                                                                                                                                                                                                                                                                                                                                                                                                                                                                                                                                                                                                                                                                                                                                                                                                                                                                                                                                                                                                                                                                                                                                                                                                                                                                                                                                                                                                                                                                                                                                                                                                                                                                                                                                                                                                                                                                       |
|--------------------------------------------------------------------------------------|-------------------------------------------------------------------------------------------------------------------------------------------------------------------------------------------------------------------------------------------------------------------------------------------------------------------------------------------------------------------------------------------------------------------------------------------------------------------------------------------------------------------------------------------------------------------------------------------------------------------------------------------------------------------------------------------------------------------------------------------------------------------------------------------------------------------------------------------------------------------------------------------------------------------------------------------------------------------------------------------------------------------------------------------------------------------------------------------------------------------------------------------------------------------------------------------------------------------------------------------------------------------------------------------------------------------------------------------------------------------------------------------------------------------------------------------------------------------------------------------------------------------------------------------------------------------------------------------------------------------------------------------------------------------------------------------------------------------------------------------------------------------------------------------------------------------------------------------------------------------------------------------------------------------------------------------------------------------------------------------------------------------------------------------------------------------------------------------------------------------------------------------------------------------------------------------------------------------------------------------------------------------------------------------------------------------------------------------------------|
| <b>Manuscript Number:</b>                                                            | PONE-D-20-39600                                                                                                                                                                                                                                                                                                                                                                                                                                                                                                                                                                                                                                                                                                                                                                                                                                                                                                                                                                                                                                                                                                                                                                                                                                                                                                                                                                                                                                                                                                                                                                                                                                                                                                                                                                                                                                                                                                                                                                                                                                                                                                                                                                                                                                                                                                                                       |
| <b>Article Type:</b>                                                                 | Research Article                                                                                                                                                                                                                                                                                                                                                                                                                                                                                                                                                                                                                                                                                                                                                                                                                                                                                                                                                                                                                                                                                                                                                                                                                                                                                                                                                                                                                                                                                                                                                                                                                                                                                                                                                                                                                                                                                                                                                                                                                                                                                                                                                                                                                                                                                                                                      |
| <b>Full Title:</b>                                                                   | Seroprevalence of COVID-19 infection in a rural district of South India: a community-based cross-sectional study.                                                                                                                                                                                                                                                                                                                                                                                                                                                                                                                                                                                                                                                                                                                                                                                                                                                                                                                                                                                                                                                                                                                                                                                                                                                                                                                                                                                                                                                                                                                                                                                                                                                                                                                                                                                                                                                                                                                                                                                                                                                                                                                                                                                                                                     |
| <b>Short Title:</b>                                                                  | Seroprevalence of COVID-19 infection in a rural district of South India                                                                                                                                                                                                                                                                                                                                                                                                                                                                                                                                                                                                                                                                                                                                                                                                                                                                                                                                                                                                                                                                                                                                                                                                                                                                                                                                                                                                                                                                                                                                                                                                                                                                                                                                                                                                                                                                                                                                                                                                                                                                                                                                                                                                                                                                               |
| <b>Corresponding Author:</b>                                                         | Carolin Elizabeth George<br>Bangalore Baptist Hospital<br>Bangalore, Karnataka INDIA                                                                                                                                                                                                                                                                                                                                                                                                                                                                                                                                                                                                                                                                                                                                                                                                                                                                                                                                                                                                                                                                                                                                                                                                                                                                                                                                                                                                                                                                                                                                                                                                                                                                                                                                                                                                                                                                                                                                                                                                                                                                                                                                                                                                                                                                  |
| <b>Keywords:</b>                                                                     | Seroprevalence , covid-19, rural India, SARS CoV-2                                                                                                                                                                                                                                                                                                                                                                                                                                                                                                                                                                                                                                                                                                                                                                                                                                                                                                                                                                                                                                                                                                                                                                                                                                                                                                                                                                                                                                                                                                                                                                                                                                                                                                                                                                                                                                                                                                                                                                                                                                                                                                                                                                                                                                                                                                    |
| <b>Abstract:</b>                                                                     | <p><b>Objectives</b><br/>                 We aimed to estimate the seroprevalence of COVID-19 in a rural district of South India, six month after the index case.</p> <p><b>Methodology</b><br/>                 We conducted a cross-sectional study of 509 adults aged more than 18 years. From all the four subdistricts, two grampanchayats (administrative cluster of 5-8 villages) were randomly selected followed by one village through convenience. The participants were invited for the study to the community-based study kiosk set up in all the eight villages through village health committees. We collected socio-demographic characteristics and symptoms using a mobile application-based questionnaire, and we tested samples for the presence of IgG antibodies for SARS CoV-2 using an electro chemiluminescent immunoassay. We calculated age-gender adjusted and test performance adjusted seroprevalence.</p> <p><b>Results</b><br/>                 The age-and gender-adjusted seroprevalence was 8.5% (95% CI 6.9%- 10.8%). The unadjusted seroprevalence among participants with hypertension and diabetes was 16.3% (95% CI:9.2-25.8) and 10.7 % (95% CI: 5.5-18.3) respectively. When we adjusted for the test performance, the seroprevalence was 6.1% (95% CI 4.02 -8.17). The study estimated 7 (95% CI 1:4.5 – 1:9) undetected infected individuals for every RT-PCR confirmed case. Infection Fatality Rate (IFR) was calculated as 12.38 per 10000 infections as on 22 October 2020. Except for the history of self-reported symptoms, age, gender education, occupation, presence of comorbidities were not associated with positive status (p-value &gt;0.05).</p> <p><b>Conclusion</b><br/>                 A significant proportion of the rural population in a district of south India remains susceptible to COVID-19. A higher proportion of susceptible, relatively higher IFR and a poor tertiary healthcare network stress the importance of sustaining the public health measures and promoting early access to the vaccine are crucial to preserving the health of this population. Low population density, good housing, adequate ventilation, limited urbanisation combined with public, private and local health leadership are critical components of curbing future respiratory pandemics.</p> |
| <b>Order of Authors:</b>                                                             | Leeberk Raja Inbaraj<br>Carolin Elizabeth George<br>Sindhulina Chandrasingh                                                                                                                                                                                                                                                                                                                                                                                                                                                                                                                                                                                                                                                                                                                                                                                                                                                                                                                                                                                                                                                                                                                                                                                                                                                                                                                                                                                                                                                                                                                                                                                                                                                                                                                                                                                                                                                                                                                                                                                                                                                                                                                                                                                                                                                                           |
| <b>Additional Information:</b>                                                       |                                                                                                                                                                                                                                                                                                                                                                                                                                                                                                                                                                                                                                                                                                                                                                                                                                                                                                                                                                                                                                                                                                                                                                                                                                                                                                                                                                                                                                                                                                                                                                                                                                                                                                                                                                                                                                                                                                                                                                                                                                                                                                                                                                                                                                                                                                                                                       |
| <b>Question</b>                                                                      | <b>Response</b>                                                                                                                                                                                                                                                                                                                                                                                                                                                                                                                                                                                                                                                                                                                                                                                                                                                                                                                                                                                                                                                                                                                                                                                                                                                                                                                                                                                                                                                                                                                                                                                                                                                                                                                                                                                                                                                                                                                                                                                                                                                                                                                                                                                                                                                                                                                                       |
| <b>Financial Disclosure</b>                                                          | Authors were supported by Azim Premji Foundation ( <a href="https://azimpremjifoundation.org/">https://azimpremjifoundation.org/</a> )                                                                                                                                                                                                                                                                                                                                                                                                                                                                                                                                                                                                                                                                                                                                                                                                                                                                                                                                                                                                                                                                                                                                                                                                                                                                                                                                                                                                                                                                                                                                                                                                                                                                                                                                                                                                                                                                                                                                                                                                                                                                                                                                                                                                                |
| Enter a financial disclosure statement that describes the sources of funding for the |                                                                                                                                                                                                                                                                                                                                                                                                                                                                                                                                                                                                                                                                                                                                                                                                                                                                                                                                                                                                                                                                                                                                                                                                                                                                                                                                                                                                                                                                                                                                                                                                                                                                                                                                                                                                                                                                                                                                                                                                                                                                                                                                                                                                                                                                                                                                                       |

work included in this submission. Review the [submission guidelines](#) for detailed requirements. View published research articles from [PLOS ONE](#) for specific examples.

This statement is required for submission and **will appear in the published article** if the submission is accepted. Please make sure it is accurate.

#### Unfunded studies

Enter: *The author(s) received no specific funding for this work.*

#### Funded studies

Enter a statement with the following details:

- Initials of the authors who received each award
- Grant numbers awarded to each author
- The full name of each funder
- URL of each funder website
- Did the sponsors or funders play any role in the study design, data collection and analysis, decision to publish, or preparation of the manuscript?
- **NO** - Include this sentence at the end of your statement: *The funders had no role in study design, data collection and analysis, decision to publish, or preparation of the manuscript.*
- **YES** - Specify the role(s) played.

\* typeset

#### Competing Interests

Use the instructions below to enter a competing interest statement for this submission. On behalf of all authors, disclose any [competing interests](#) that could be perceived to bias this work—acknowledging all financial support and any other relevant financial or non-financial competing interests.

This statement **will appear in the published article** if the submission is accepted. Please make sure it is accurate. View published research articles from [PLOS ONE](#) for specific examples.

This was not a research grant but a philanthropic support for COVID response.

The funders had no role in study design, data collection and analysis, decision to publish, or preparation of the manuscript.

The authors have declared that no competing interests exist.

**NO authors have competing interests**

Enter: *The authors have declared that no competing interests exist.*

**Authors with competing interests**

Enter competing interest details beginning with this statement:

*I have read the journal's policy and the authors of this manuscript have the following competing interests: [insert competing interests here]*

\* typeset

**Ethics Statement**

Enter an ethics statement for this submission. This statement is required if the study involved:

- Human participants
- Human specimens or tissue
- Vertebrate animals or cephalopods
- Vertebrate embryos or tissues
- Field research

Write "N/A" if the submission does not require an ethics statement.

General guidance is provided below. Consult the [submission guidelines](#) for detailed instructions. **Make sure that all information entered here is included in the Methods section of the manuscript.**

The study was approved by the Ethics Committee of Bangalore Baptist Hospital on 30 June 2020. Written Informed consent was taken from all the participants before data collection.

**Format for specific study types**

**Human Subject Research (involving human participants and/or tissue)**

- Give the name of the institutional review board or ethics committee that approved the study
- Include the approval number and/or a statement indicating approval of this research
- Indicate the form of consent obtained (written/oral) or the reason that consent was not obtained (e.g. the data were analyzed anonymously)

**Animal Research (involving vertebrate animals, embryos or tissues)**

- Provide the name of the Institutional Animal Care and Use Committee (IACUC) or other relevant ethics board that reviewed the study protocol, and indicate whether they approved this research or granted a formal waiver of ethical approval
- Include an approval number if one was obtained
- If the study involved *non-human primates*, add *additional details* about animal welfare and steps taken to ameliorate suffering
- If anesthesia, euthanasia, or any kind of animal sacrifice is part of the study, include briefly which substances and/or methods were applied

**Field Research**

Include the following details if this study involves the collection of plant, animal, or other materials from a natural setting:

- Field permit number
- Name of the institution or relevant body that granted permission

**Data Availability**

Authors are required to make all data underlying the findings described fully available, without restriction, and from the time of publication. PLOS allows rare exceptions to address legal and ethical concerns. See the [PLOS Data Policy](#) and [FAQ](#) for detailed information.

Yes - all data are fully available without restriction

A Data Availability Statement describing where the data can be found is required at submission. Your answers to this question constitute the Data Availability Statement and **will be published in the article**, if accepted.

**Important:** Stating 'data available on request from the author' is not sufficient. If your data are only available upon request, select 'No' for the first question and explain your exceptional situation in the text box.

Do the authors confirm that all data underlying the findings described in their manuscript are fully available without restriction?

**Describe where the data may be found in full sentences. If you are copying our sample text, replace any instances of XXX with the appropriate details.**

- If the data are **held or will be held in a public repository**, include URLs, accession numbers or DOIs. If this information will only be available after acceptance, indicate this by ticking the box below. For example: *All XXX files are available from the XXX database (accession number(s) XXX, XXX).*
- If the data are all contained **within the manuscript and/or Supporting Information files**, enter the following: *All relevant data are within the manuscript and its Supporting Information files.*
- If neither of these applies but you are able to provide **details of access elsewhere**, with or without limitations, please do so. For example:

*Data cannot be shared publicly because of [XXX]. Data are available from the XXX Institutional Data Access / Ethics Committee (contact via XXX) for researchers who meet the criteria for access to confidential data.*

*The data underlying the results presented in the study are available from (include the name of the third party*

Data has been attached as a supporting information (S.2)

*and contact information or URL).*

- This text is appropriate if the data are owned by a third party and authors do not have permission to share the data.

\* typeset

Additional data availability information:

1 **Title Page**

2 **Type of article: Original research**

3 **Title: Seroprevalence of COVID-19 infection in a rural district of South India: a**  
4 **community-based cross-sectional study.**

---

6 **Leeberk Raja Inbaraj<sup>1</sup>, Carolin Elizabeth George<sup>1\*</sup>, Sindhulina Chandrasingh<sup>2</sup>**

7 **Author affiliations:**

- 8 1. Division of Community Health and Family Medicine, Bangalore Baptist Hospital,  
9 Bangalore, Karnataka, India - 560024  
10 2. Department of Microbiology, Bangalore Baptist Hospital, Bangalore, Karnataka,  
11 India- 560024

12 **\*Corresponding author**

13 Dr Carolin Elizabeth George MBBS, MD

14 Consultant & Head, Department of Family Medicine & Community Health,

15 Bangalore Baptist Hospital, Bangalore

16 Mob: +91 9972156838 ; Email: carolinelizabethj@gmail.com

17

18 Total number of photographs: 0

19 Total number of figures: 1

20 Total number of Tables: 2

21 Word counts

22 For abstract: 298

23 For the text (without references): 3414

24

25

26

27 **Abstract**

28 **Objectives**

29 We aimed to estimate the seroprevalence of COVID-19 in a rural district of South India, six  
30 month after the index case.

31 **Methodology**

32 We conducted a cross-sectional study of 509 adults aged more than 18 years. From all the  
33 four subdistricts, two grampanchayats (administrative cluster of 5-8 villages) were randomly  
34 selected followed by one village through convenience. The participants were invited for the  
35 study to the community-based study kiosk set up in all the eight villages through village  
36 health committees. We collected socio-demographic characteristics and symptoms using a  
37 mobile application-based questionnaire, and we tested samples for the presence of IgG  
38 antibodies for SARS CoV-2 using an electro chemiluminescent immunoassay. We calculated  
39 age-gender adjusted and test performance adjusted seroprevalence.

40 **Results**

41 The age-and gender-adjusted seroprevalence was 8.5% (95% CI 6.9%- 10.8%).The  
42 unadjusted seroprevalence among participants with hypertension and diabetes was 16.3%  
43 (95% CI:9.2-25.8) and 10.7 % (95% CI: 5.5-18.3) respectively.When we adjusted for the test  
44 performance, the seroprevalence was 6.1% (95% CI 4.02 -8.17). The study estimated 7 (95%  
45 CI 1:4.5 – 1:9) undetected infected individuals for every RT-PCR confirmed case. Infection  
46 Fatality Rate (IFR) was calculated as 12.38 per 10000 infections as on 22 October 2020.  
47 Except for the history of self-reported symptoms, age, gender education, occupation,  
48 presence of comorbidities were not associated with positive status (p-value >0.05).

49 **Conclusion**



50 A significant proportion of the rural population in a district of south India remains susceptible  
51 to COVID-19. A higher proportion of susceptible, relatively higher IFR and a poor tertiary  
52 healthcare network stress the importance of sustaining the public health measures and  
53 promoting early access to the vaccine are crucial to preserving the health of this population.  
54 Low population density, good housing, adequate ventilation, limited urbanisation combined  
55 with public, private and local health leadership are critical components of curbing future  
56 respiratory pandemics.

57  
58  
59  
60  
61  
62  
63  
64  
65  
66  
67  
68  
69  
70  
71  
72  
73  
74  
75

76 **Seroprevalence of SARS-CoV-2 (IgG) in Bangalore rural district in Southern India: a**  
77 **cross-sectional Study**

78 **Introduction**

79 Coronavirus disease (COVID-19) was declared as a global pandemic by the World Health  
80 Organization on 11 March 2020 [1]. Globally, more than 60 million confirmed cases of  
81 COVID-19, including 1,416,292 deaths, have been reported to WHO as of 26 November  
82 2020.[2] India has reported more than 9.2 million cases with more than with 135,223 deaths  
83 and Karnataka- a south Indian state had 894,137 cases with 8,512 deaths as of 26 November  
84 2020 [3,4].

85 There has been substantial evidence that a large proportion of the people infected with SARS  
86 CoV-2 are asymptomatic, but they can infect others. It has been reported based on an analysis  
87 of 21 published reports that asymptomatic cases could account from 5 to 80% [5]. It is crucial  
88 to recognise an infected person early and break the route of transmission to control COVID-  
89 19. However, in reality, they do not require or seek medical attention and contribute to the  
90 rapid spread of the disease [6]. Hence, health authorities cannot totally rely on confirmed  
91 cases of COVID-19 detected by RT-PCR as it could potentially miss asymptomatic and pre-  
92 symptomatic infections for containment measures. In order to overcome this challenge, WHO  
93 and others have recommended population-based seroepidemiological studies to generate data  
94 and to implement containment measures accordingly [7]. These surveys also can give us an  
95 estimation of the proportion of the population still susceptible to the infection as it is assumed  
96 that antibodies provide immunity.

97 Indian Council of Medical Research (ICMR) has conducted a nationwide serosurvey among  
98 21 states and reported a population-weighted seroprevalence of 0.73% between May and June  
99 2020.[8] While a hospital-based survey from Srinagar, northern India has estimated gender-

100 standardised seroprevalence of 3.6%, in July 2020 an unpublished study from one of the  
101 largest slums in Bangalore revealed a seroprevalence of 57% in September 2020 [9,10].

102 Community Health Division (CHD) of Bangalore Baptist Hospital has been providing  
103 curative and preventive health services through a Rural Health centre and network of mobile  
104 clinics to residents of Bangalore rural district over a decade. CHD also runs special programs  
105 for chronic diseases, disability rehabilitation and alcohol de-addiction. One of our flagship  
106 programs is home-based rural palliative care program which has benefited numerous patients  
107 with terminal illness ever since it was initiated in 2005. Our grass root workers continued to  
108 do home visits to provide home care, monitor blood pressure and blood sugar, and to educate  
109 the community about COVID-19. However, we had stopped our mobile clinics to reduce the  
110 urban-rural transmission of infection. As there can be considerable variation in the  
111 seroprevalence based on geographical setting and density of the population, knowledge of  
112 seroprevalence in this community help us to conduct a risk-benefit analysis of certain  
113 services like mobile clinics, which improves access to medical care at the cost of spreading  
114 the virus to the rural community. Hence, we designed a community-based cross-sectional  
115 study to estimate a seroprevalence in Bangalore rural district six months after the index case.  
116 We also hope the findings of this study will help the health authorities in disease containment  
117 and add valuable data to researchers across the globe.

## 118 **Materials and methods**

### 119 *Setting*

120 The study was conducted in Bangalore Rural District of Karnataka, a South Indian State.  
121 This district is located close to Bangalore city and is divided into four sub-districts (taluks)  
122 and 105 gram panchayats which are village administrative units (Fig.1). Each gram  
123 panchayats has a cluster of 10-15 villages [11]. According to the Indian Census 2011, the

124 population was 9,90,923, and the sex-ratio was 945 females for every male, which is lesser  
125 than the state of the average of 973. The district has a population density of 441 inhabitants  
126 per square kilometre. The villagers are dependent on farming and farming related activities  
127 such as cattle rearing for their income. However, the advent of Special Economic Zone (SEZ)  
128 and Bangalore International Airport in this district, service and Information technology  
129 industries are also booming in the past few years [12]. Health care in the district is delivered  
130 through the Government health system and private practitioners. Apart from primary health  
131 care, BBH also established strong community connections through the formation of village  
132 health committees and linking with the rural self-government.

### 133 **Fig.1 Pictorial map of Bangalore rural district**

#### 134 *Study design and sample size*

135 We designed a cross-sectional seroepidemiological survey in Bangalore rural district based  
136 on the recommendation of WHO as the most appropriate study design [13]. A serosurvey  
137 from a densely populated slum in Mumbai, India reported a seroprevalence 57%, and we  
138 assumed a seroprevalence of 30% (lower risk of transmission in rural areas compared to  
139 slums) in the rural district. We calculated a minimum sample size of 504 with 5% absolute  
140 and a design effect of 1.5 [14].

#### 141 *Data collection*

142 Bangalore Rural District consists of four sub-districts which are further divided into  
143 grampanchayats which are village administrative units. From the four sub-districts, we  
144 randomly chose two grampanchayats. In each grampanchayat, a village which is centrally  
145 located was chosen as a sampling unit based on convenience, and a kiosk was set up in one of  
146 the trusted community spaces in each village. Our community health workers invited people  
147 (adults  $\geq 18$  years) from houses to give blood samples. If a household refused to participate,

148 then the next house was approached. In each cluster, mobilisation continued till the desired  
149 sample size was achieved in each village. We aimed to include 63 adults from each of these  
150 villages, adding up to 126 in each sub-district.

151 We met with the village health committees and discussed the purpose of the study and  
152 enlisted their cooperation. Together with the community, we decided that kiosk-based  
153 recruitment of the participants was more practical due to strict restriction on the movement of  
154 the people by the state government. People were also apprehensive about the health team  
155 from cities visiting their homes and increasing the risk of transmission of the disease.

156 We recruited people after explaining the purpose of the study, took written consent and then  
157 interviewed people with a questionnaire by a trained research coordinator who had previous  
158 training in data collection. An E<sup>+</sup> info mobile application-based tool was used to capture  
159 responses offline by the interviewer, and it was later downloaded for analysis.

160 The questionnaire contained questions about demographic information (age, gender,  
161 education, comorbidities such as diabetes, hypertension, lung disease and cancer), history of  
162 exposure to COVID-19 infection (history of being diagnosed as COVID-19 case, interaction  
163 and household contacts with persons with confirmed COVID-19), any history of COVID-19  
164 related symptoms a month before the survey. After the completion of the interview, our  
165 phlebotomists collected 5ml of blood from each participant via venepuncture in a plain  
166 vacutainer. They transported it to BBH laboratory within 5 hours, maintaining the cold chain.

### 167 *Sample processing and analysis*

168 The serum was separated and used to test for antibodies using the Elecsys Anti SARS CoV2  
169 assay, an electro chemiluminescent immunoassay using a recombinant protein representing  
170 the nucleocapsid (N) antigen for the determination of high-affinity antibodies (including IgG)  
171 against SARS CoV2 [15]. This assay employs a cut-off index (COI) that is automatically

172 calculated from two calibration standards—a COI of 1.0 or more is considered  
173 reactive/positive, and a COI less than or equal to 1.0 is reported as nonreactive/negative. The  
174 assay sensitivity and specificity were reported to be 97.2% (95.4–98.4) and 99.8% (99.3–  
175 100) respectively, in samples taken 30 days or more post symptom onset. [16] A unique  
176 identification number was used to link the interview information and laboratory results.

### 177 *Statistical analysis*

178 We used Statistical Package for the Social Sciences version 20.0 and STATA version 15.0 for  
179 statistical analysis. The frequency of characteristics of the survey participants was described.  
180 Unadjusted seroprevalence of COVID-19 IgG antibody was reported in per cent with 95%  
181 confidence interval (CI). We used rural area figures of Karnataka from the Sample  
182 Registration System (SRS) statistical report 2018 to calculate weights for reporting age-and-  
183 gender standardised seroprevalence [17] (S.1 Table).

184 Case-to-undetected-infections ratio (CIR), was calculated as a ratio of the number of reported  
185 RT-qPCR-confirmed COVID-19 cases two weeks before the initiation of serosurvey to the  
186 number of people who have antibodies in our study. This was based on an earlier study  
187 reported median seroconversion times for total antibodies, IgM and then IgG at day-11, day-  
188 12 and day-14, respectively based on hospitalised patients and seroconversion for IgG and  
189 IgM is reported to occur simultaneously or sequentially [18, 19]. Assuming a three-week lag  
190 time from infection to death, we considered the reported number of fatalities after three  
191 weeks of the survey to estimate the plausible range of the infection fatality ratio (IFR) [16]. It  
192 was calculated as the number of deaths reported upon the total number of people with high-  
193 affinity antibodies per 10000 infections. We used a projected population of 2020 Bangalore  
194 rural district using 2011 census data prepared by Directorate of Economics and statistics,

195 Bangalore 2013 to calculate all these parameters. [20] The association of seroprevalence with  
196 comorbid conditions and socio-demographic characteristics was tested using chi-square tests.

### 197 *Ethical consideration*

198 The Ethics Committee on Bangalore Baptist Hospital approved the survey protocol on 30  
199 June 2020. Written informed consent was obtained from the participants, and the test results  
200 were communicated to them.

### 201 **Results**

202 Our 509 participants were almost equally distributed in four taluks (Doddaballapur – 28.6%,  
203 Devanahalli -23.5%, Nelamangala – 25.7%, Hoskote -20.2%) of Bangalore rural district. The  
204 mean age was 47.0 +/- 16.4 years, and the majority were men (52.3%). Most people (86.0%)  
205 had less than 12 years of education, and 28.4 % were either not working or homemakers.  
206 Hypertension (20.2%) and diabetes (16.9 %) were reported as the most common  
207 comorbidities. (Table. 1). Among 509 individuals, 7/509 (1.37%) had at least one symptoms  
208 suggestive of COVID-19 in the last three months before the interview, 5/509 ( 0.98%)  
209 reported a history of an infected family member, and none of them gave a history exposure  
210 to an infected person in the past or tested positive for COVID-19

211

212

213

214

215

216

217 **Table.1 Socio-demographic Characteristics of the study population**

218

| Demographics  | Variables            | N   | Percentage <sup>219</sup> |
|---------------|----------------------|-----|---------------------------|
| Age Group     | ≤20                  | 18  | 3.5                       |
|               | 21-40                | 177 | 34.8 <sup>220</sup>       |
|               | 41-60                | 208 | 40.9                      |
|               | >60                  | 106 | 20.8 <sup>221</sup>       |
| Sex           | Male                 | 266 | 52.3                      |
|               | Female               | 243 | 47.7 <sup>222</sup>       |
| Education     | Illiterate           | 125 | 24.6                      |
|               | Primary              | 96  | 18.9 <sup>223</sup>       |
|               | Middle school        | 05  | 1.0                       |
|               | High School          | 117 | 23.0 <sup>224</sup>       |
|               | PUC/Diploma          | 95  | 18.7 <sup>225</sup>       |
|               | Degree               | 71  | 13.9                      |
| Occupation    | Housewife            | 58  | 11.4 <sup>226</sup>       |
|               | Domestic Helper      | 12  | 2.4                       |
|               | Daily wage labourer  | 49  | 9.6 <sup>227</sup>        |
|               | Notworking           | 87  | 17.1                      |
|               | Professional         | 81  | 15.9 <sup>228</sup>       |
|               | Other <sup>229</sup> | 61  | 12.0                      |
| Comorbidities | Diabetes             | 103 | 20.2 <sup>229</sup>       |
|               | Hypertension         | 86  | 16.9 <sup>230</sup>       |

231 The overall seroprevalence of <sup>230</sup> COVID-19 was 12.4% (95 % CI 9.6-15.6) (Table.2) The  
 232 age-and gender-adjusted seroprevalence was 8.5% (95% CI 6.9%- 10.8%) (S.1 Table). The  
 233 unadjusted seroprevalence among participants with hypertension and diabetes was 16.3%  
 234 (95% CI:9.2-25.8) and 10.7 % (95% CI: 5.5-18.3) respectively, but the association with  
 235 seropositivity was not significant. Among seropositive individuals, one participant reported a  
 236 history of a family member being positive in the last three months before the interview. The



237 majority (92.0%) of the seropositive individuals, did not report any symptom related to  
 238 COVID-19 infection at the time of the study nor in the past.

239 **Table.2 Unadjusted Seroprevalence of COVID-19 in Bangalore rural district, India.**

|              | <b>Category</b> | <b>Male</b> | <b>Prevalence<br/>(95% CI)</b> | <b>Female</b> | <b>Prevalence<br/>(95% CI)</b> | <b>Total</b> | <b>Overall<br/>prevalence<br/>(95% CI)</b> |
|--------------|-----------------|-------------|--------------------------------|---------------|--------------------------------|--------------|--------------------------------------------|
| Age<br>(yrs) | ≤20             | 10          | 10 (0.3-44.5)                  | 8             | 0                              | 18           | 5.6 (0.1 -27.3)                            |
|              | 21-40           | 86          | 10.5 (4.9-18.9)                | 91            | 16.5 (9.5-25.7)                | 177          | 13.6 (8.9- 19.5)                           |
|              | 41-60           | 120         | 13.3 (7.8-20.7)                | 88            | 11.4(5.6 -19.9)                | 208          | 12.5 (8.3-17.8)                            |
|              | >60             | 50          | 12.0 (4.5-24.3)                | 56            | 10.7 (4.0 – 21.9)              | 106          | 11.3 (6.0 -18.9)                           |
|              | <b>Total</b>    | <b>266</b>  | <b>12.0 (8.4- 16.6)</b>        | <b>243</b>    | <b>12.0 (8.8- 17.6)</b>        |              | <b>12.4 (9.6-15.6)</b>                     |

240

241

242 We estimated that the cumulative number of SARS CoV-2 (Severe acute respiratory  
 243 syndrome coronavirus 2) infection in Bangalore rural district was 96,874 (95% CI 78638-  
 244 123086) during two weeks before the beginning of the study (17 September to 1 October  
 245 2020). When we adjusted for sensitivity and specificity of the test kit, the seroprevalence was  
 246 6.1% (95% CI 4.02 -8.17) and the cumulative number of infections was 69,521 (95% CI  
 247 45815 – 92315).

248 The cumulative number of RT-PCR confirmed cases till 2 October was 10054 in Bangalore  
 249 rural district. The study estimated 7 (96854/10054) undetected infected individuals for every  
 250 RT-PCR (Reverse Transcription Polymerase Chain Reaction) confirmed case, i.e., case-to-  
 251 undetected-infections ratio (CIR) of 1:7 and CIR could range from 1:4.5 to 1:9. Based on  
 252 age-gender adjusted seroprevalence rate, the Infection Fatality Rate (IFR) was calculated as  
 253 12.38 per 10000 infections as on 22 October 2020 in Bangalore rural district.

254 Age, gender education, occupation, presence of comorbidities were not associated with  
255 positive status (p-value >0.05). In contrast, the history of at least one self-reported symptoms  
256 suggestive of COVID-19 in the last three months before the study was significantly  
257 associated with seropositivity.

## 258 **Discussion**

259 Our study revealed that a large proportion of the rural population remains susceptible to  
260 infection and far from reaching the seroprevalence required for herd immunity. A serosurvey  
261 from Karnataka during the same period (3- 16 September) has reported a slightly higher  
262 seroprevalence of 15.2% in the same district [21]. The variation can be attributed to samples  
263 collected from multiple settings, including hospital settings and among the high-risk group.

264 The low prevalence in this rural district is in contrast to an earlier unpublished study by the  
265 same investigators that was conducted in a dense urban slum in Bangalore City, which  
266 showed a seroprevalence of 57%.[9] This is expected as the participants in the current study,  
267 lived in sparsely populated villages, in well-ventilated houses and with the privilege of less  
268 polluted air. When the government imposed lockdown, the adequacy of minimal resources  
269 for sustenance and the self-reliance of the villages, reduced travel to cities a minimum. These  
270 factors would have limited the spread of the infection.

271 Our study estimated that there were 5 to 9 undetected infected individuals for every RT-PCR  
272 confirmed case. This shows that most of the infection was picked up the existing testing  
273 infrastructure. CIR in Bangalore rural district was close to reported estimates of Bangalore  
274 city (1.10), can be accounted to its proximity to the city [21]. CIR reported in this study, is  
275 much lower than other studies in the western countries, probably due to high testing rate in  
276 India during recent months [8,18]. However, slums from Bangalore city reported a high CIR

277 of 1:195 as compared to rural counterparts. Poor health infrastructure and high prevalence of  
278 stigma leading to underreporting may be the reason for high CIR in slums.[9]

279 We found age and comorbidities were not significantly associated with seropositivity.  
280 Though advanced age and comorbidities are associated with severe illness, there is limited  
281 data regarding increased COVID 19 susceptibility with mild asymptomatic cases [22]. The  
282 hospital-based study from Srinagar found that people between the age group of 30-69 years  
283 had higher odds of being seropositive (IgG) compared as compared to the younger population  
284 while they did not find any gender difference [10]. However, the nationwide survey showed  
285 male gender was significantly associated with seropositivity than females [8]. Age and  
286 gender have a profound influence on mobility and is varied across cultures. Hence the  
287 susceptibility to infection can be attributed to the function of mobility rather than age and  
288 gender per se.

289 Though diabetes has been associated with increased mortality in COVID-19, the  
290 susceptibility to the infection may be same as the general population [23]. The same was  
291 reflected in our study. Though rural, this population had access to diagnosis and treatment of  
292 common comorbidities due to the outreach of the public-spirited hospital and the government  
293 health system. Access to chronic medications was facilitated even during the lockdown and  
294 intense resource reallocation following COVID-19, through our grass-root health workers  
295 who delivered medicines at home for people with chronic diseases to keep their diseases  
296 under control. We could imply that the efforts to sensitise the public regarding COVID19 by  
297 the government and private sectors in sensitisation have played a valuable role.

298 We estimated an IFR of 12.8 per 10000 infections or 0.13%, which is comparable to what is  
299 reported from the Indian subcontinent ( 0.27-1.03) and other countries like USA (0.12-0.2%)  
300 Iran (0.08-0.12%), Brazil and Spain (1%) [8,21,24]. Estimating IFR is a challenge as it will

301 depend on infection rate (seroprevalence) and the robustness of system capturing mortality.  
302 Both variables have estimation challenges of varying degrees in different parts of India. Since  
303 there are only a handful of studies estimating seroprevalence, we have only limited studies to  
304 compare. IFR reported in a study conducted in a Bangalore slum during the same period was  
305 absurdly low (0.03%), which can be attributed to under-reporting of deaths rather than  
306 reduced fatality in urban slums [9].

307 We could draw several implications from the findings of the study. First and foremost, rural  
308 areas succeeded in halting the spread of infection to a greater extent as compared to cities.  
309 However, rural areas are challenged by the poor health system and low cash economy,  
310 distancing itself from urbanisation reaped overall health benefits to people in villages, in  
311 terms of the number of infections. This is a reminder that guarded urbanisation preserving the  
312 natural ecosystem is an essential determinant of health.

313 Secondly, strict containment strategies like lockdown curbed infection without profound  
314 livelihood implication  in this rural setting. This was possible because of the strength of the  
315 local economy and reduced inequities. The villages had enough seasonal grains (ragi, a  
316 millet), homegrown vegetables and dairy products for nourishment. Since the population  
317 density was less, there was enough water for the increased demand for handwashing, clean air  
318 to breathe, and physical distancing was a practical possibility. Strong social connections, a  
319 powerful rural disposition added value during COVID-19 infections. Neighbourhoods took  
320 care of infected households with food and essential medicines and arranged for a referral if  
321 they need hospital support.

322 Thirdly, low seroprevalence should be looked in two ways. One way to look at this  
323 'achievement', success in preventing the spread and the other way to look at it as  
324 'responsibility' due to susceptibility. Since we assume that other villages in India have similar

325 or a slightly lesser seroprevalence, we need to keep in mind' huge susceptible burden' as  
326 68.84% of India's population live in villages according to the census (2011) [25]. This has  
327 potential to staggering peaks and gives a warning signal for policymakers about the  
328 possibilities of multiple waves of the pandemic. In this context, discussion on sustaining  
329 safety measures and access to vaccination is of paramount importance.

330 The study has potential biases. Though all the subdistricts were selected, and subsequently  
331 villages were randomly selected, we employed convenience sampling at the village level.  
332 Villages were apprehensive about the medical team from the city, and hence we enrolled  
333 based on individual preference. This would have resulted in selection bias; however, we tried  
334 to reduce the bias by calculating age-gender adjusted seroprevalence. Another possibility is  
335 the occurrence of measurement bias in estimating seroprevalence. Since we have not done  
336 RT-PCR, we would have missed the current infection and underestimated the prevalence.  
337 Measurement bias can also be due to validity parameters of the test, which we have addressed  
338 through test performance adjusted seroprevalence.

339 There are many strengths to this study. This is one of the earliest population-based  
340 seroprevalence study conducted in a rural district of India harbouring a million people. This  
341 contributes to the body of evidence regarding the virus, its spread and the future implications  
342 in the rural context. The study being conducted by researchers who knows the population  
343 closely is an added advantage as the results are discussed in relation to the contextual  
344 realities.

345 This study has a few limitations. We did not follow a strict probability sampling technique  
346 due to feasibility reasons. Another limitation is that we did not estimate the current infection  
347 using RT-PCR. Both these aspects have an effect on the true estimation of seroprevalence in

348 this community. Another limitation is that we have limited our research to one rural district;  
349 hence the generalisation of the findings has to be done with caution.

### 350 **Conclusion**

351 We found a low seroprevalence of COVID 19 infection among rural population in a district  
352 of South India, six months after the index case. The age-old public health measures of low  
353 population density, good housing, adequate ventilation, hygiene measures combined with the  
354 public, private and local health leadership limited the spread of an infectious respiratory viral  
355 pathogen in this low resource setting. Since more than three fourth of the rural population  
356 remains susceptible to COVID-19, sustaining public health measures and promoting access to  
357 vaccination is of utmost importance to safeguard the health this population as severe COVID  
358 19 can be overtly burdensome owing to poor tertiary healthcare landscape of the rural setting.

### 359 **References:**

- 360 1. WHO characterizes COVID-19 as Pandemic [Internet]. 2019 Mar 11 [cited on 2020  
361 Dec 16]; Available from : [https://www.who.int/emergencies/diseases/novel-](https://www.who.int/emergencies/diseases/novel-coronavirus-2019/events-as-they-happen)  
362 [coronavirus-2019/events-as-they-happen](https://www.who.int/emergencies/diseases/novel-coronavirus-2019/events-as-they-happen)
- 363 2. WHO Coronavirus Disease (COVID-19) Dashboard [Internet]. 2020 Nov 26 [Cited  
364 on 2020 Nov 26]; Available from: <https://covid19.who.int>
- 365 3. WHO Indian situation [Internet]. 2020 Nov 26 [Cited on 2020 Nov 26]; Available  
366 from: <https://covid19.who.int/region/searo/country/in>
- 367 4. Karnataka Covid-19 Dashboard [Internet]. 2020 Nov 26 [Cited on 2020 Nov 26];  
368 Available from; <https://covid19.karnataka.gov.in/covid-dashboard/dashboard.html>
- 369 5. Yanes-Lane M, Winters N, Fregonese F, Bastos M, Perlman-Arrow S, Campbell JR et  
370 al. Proportion of asymptomatic infection among COVID-19 positive persons and their  
371 transmission potential: A systematic review and meta-analysis. PLoS One. 2020 Nov  
372 3;15(11):e0241536
- 373 6. Gao Z, Xu Y, Sun C, Wang X, Guo Y, Qiu S, et al. A Systematic Review of  
374 Asymptomatic Infections with COVID-19. J Microbiol Immunol Infect. 2020 15  
375 May;1-6
- 376 7. World Health Organization. Coordinated global research roadmap: 2019 novel  
377 coronavirus; March 2020. Geneva: WHO; 2020.
- 378 8. Murhekar MV, Bhatnagar T, Selvaraju S, Rade K, Saravanakumar V, Vivian  
379 Thangaraj JW, et al. Prevalence of SARS-CoV-2 infection in India: Findings from the  
380 national serosurvey, May-June 2020. Indian J Med Res. 2020 Aug;152(1 & 2):48–60.
- 381 9. George CE, Inbaraj LR, Chandrasingh S. High seroprevalence of COVID-19 infection  
382 in a large slum in South India; what does it tell us about managing a pandemic and  
383 beyond?. Epidemiology & Infection ( Forthcoming)

- 384 10. Khan SMS, Qurieshi MA, Haq I, Majid S, Bhat AA, Nabi S, et al. Seroprevalence of  
385 SARS-CoV-2 specific IgG antibodies in District Srinagar, northern India - A cross-  
386 sectional study. PLoS One. 2020;15(11):e0239303.
- 387 11. Bangalore rural district demography [Internet]. [cited on 2020 Dec 16]; Available  
388 from: <https://bangalorerural.nic.in/en/demography/>
- 389 12. Bangalore Rural district [Internet]. [Cited on 2020 16 December]; Available from:  
390 [https://en.wikipedia.org/wiki/Bangalore\\_Rural\\_district](https://en.wikipedia.org/wiki/Bangalore_Rural_district)
- 391 13. Population-based age-stratified seroepidemiological investigation protocol for  
392 coronavirus 2019 (COVID-19) infection [Internet]. 2020 May 26 [Cited on 2020 Dec  
393 16]; Available from: [https://www.who.int/publications/i/item/WHO-2019-nCoV-  
394 Seroepidemiology-2020.2](https://www.who.int/publications/i/item/WHO-2019-nCoV-Seroepidemiology-2020.2)
- 395 14. Malani A, Shah D, Kang G, Lobo GN, Shastri J, Mohanan M, et al. Seroprevalence of  
396 SARS-CoV-2 in slums versus non-slums in Mumbai, India. Lancet Glob Health. 2020  
397 Nov 13;
- 398 15. Elecsys Anti-SARS-CoV-2 [Internet]. [Cited on 2020 Dec 16]; Available from:  
399 <https://www.fda.gov/media/137605/download>
- 400 16. National SARS-CoV-2 Serology Assay Evaluation Group. Performance  
401 characteristics of five immunoassays for SARS-CoV-2: a head-to-head benchmark  
402 comparison. Lancet Infect Dis. 2020;20(12):1390–400.
- 403 17. Sample Registration System (SRS) Bulletins [Internet]. [Cited on 2020 Dec  
404 16]; Available from:  
405 [https://censusindia.gov.in/vital\\_statistics/SRS\\_Bulletins/Bulletins.html](https://censusindia.gov.in/vital_statistics/SRS_Bulletins/Bulletins.html)
- 406 18. Zhao J, Yuan Q, Wang H, Liu W, Liao X, Su Yet al. Antibody Responses to SARS-  
407 CoV-2 in Patients With Novel Coronavirus Disease 2019. Clin Infect Dis.  
408 2020;71(16):2027-2034
- 409 19. Long QX, Liu BZ, Deng HJ, Wu GC, Deng K, Chen YK, et al. Antibody responses to  
410 SARS-CoV-2 in patients with COVID-19. Nature Medicine 2020; 26: 845-8
- 411 20. Projected population of Karnataka 2012-2021, Directorate of Economics and  
412 Statistics Bangalore 2013 [Internet]. [Cited on 2020 16 December]; Available from:  
413 <https://des.kar.nic.in/docs/Projected%20Population%202012-2021.pdf>
- 414 21. Babu GR, Sundaresan R, Athreya S, Akhtar J, Pandey PK, Maroor SP et al. The  
415 burden of active infection and anti-SARS-CoV-2 IgG antibodies in the general  
416 population: Results from a statewide survey in Karnataka, India. medRxiv 2020. doi:  
417 <https://doi.org/10.1101/2020.12.04.20243949>
- 418 22. Vahidy FS, Nicolas JC, Meeks JR, Khan O, Pan A, Jones SL, et al. Racial and ethnic  
419 disparities in SARS-CoV-2 pandemic: analysis of a COVID-19 observational registry  
420 for a diverse US metropolitan population. BMJ Open. 2020 Aug 11;10(8):e039849.  
421 doi: 10.1136/bmjopen-2020-039849.
- 422 23. Hussain A, Bhowmik B, do Vale Moreira NC. COVID-19 and diabetes: Knowledge  
423 in progress. Diabetes Res Clin Pract. 2020;162:108142.  
424 doi:10.1016/j.diabres.2020.108142
- 425 24. Mallapaty S. How deadly is the coronavirus? Scientists are close to an answer.  
426 Nature. 2020 Jun;582(7813):467-468. doi: 10.1038/d41586-020-01738-2.
- 427 25. Office of the Registrar General & Census Commissioner, India, Villages By  
428 Population in English [Internet]. [cited on 2020 16 December]. Available from  
429 :[https://censusindia.gov.in/2011census/population\\_enumeration.html](https://censusindia.gov.in/2011census/population_enumeration.html)

431 **Ethics approval and consent to participate**

432 The study was approved by the Ethics Committee of Bangalore Baptist Hospital on 30 June  
433 2020. Written Informed consent was taken from all the participants before data collection.

434 **Consent for publication**

435 Not applicable

436 **Availability of data and materials**

437 Available as a part of the manuscript in the supporting information (S2)

438 **Funding**

439 Azim Premji Foundation, Bangalore, India

440 **Conflict of interest**

441 CEG, LRI, SC declare no conflict of interest

442 **Authors' contributions**

443 LRI contributed to the conception and design of work, acquisition, analysis and interpretation  
444 of data, and was the primary contributor to the draft paper and revisions. CEG contributed to  
445 the conception, study design, developed the study tool, supervised data collection,  
446 participated in analysis and interpretation, contributed to the writing of the article. SC  
447 contributed to the conception, supervised and validated the blood analysis. All authors  
448 revised the work for important intellectual content and agreed to be accountable for all  
449 aspects of the work. All authors read and approved the final manuscript.

450 **Acknowledgement**

451 We would like to thank Mr Tata Rao creating Epi-data for data collection, conducting  
452 preliminary analysis and his help with referencing, and data collection. We also acknowledge



453 the support of Ms.Sangeetha and Mr.Prakash in their assistance in data collection. We are  
454 grateful for the support of people Bangalore rural district for their participation in the study.

455 **S.1 Table- Age- and gender-standardized seroprevalence.**

456

457 **S.2 Data**

458

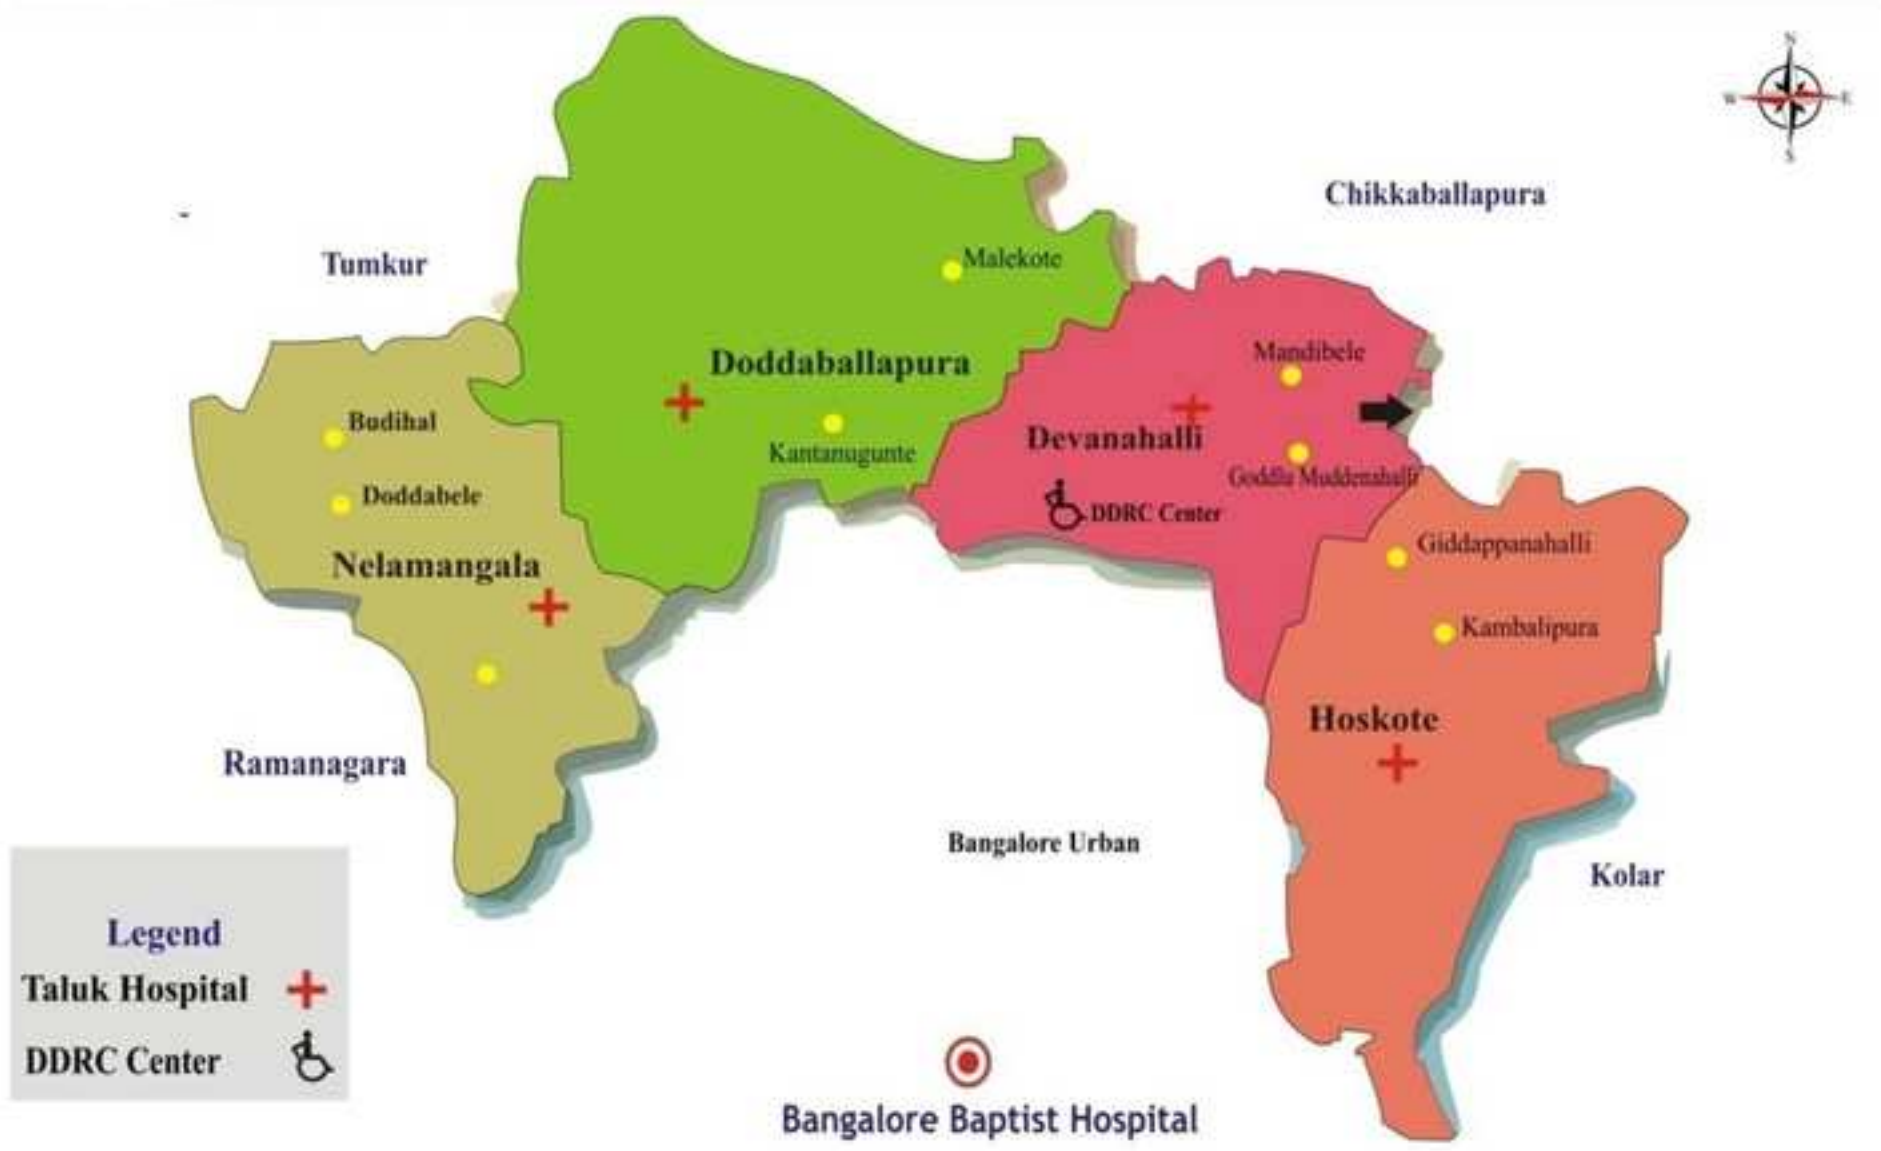

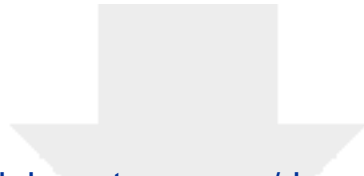

Click here to access/download

**Supporting Information**

journal.pone.0239303.s005 (2).log

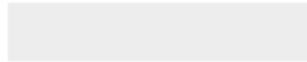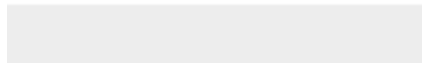



Click here to access/download  
**Supporting Information**  
Rural (1).sav

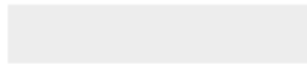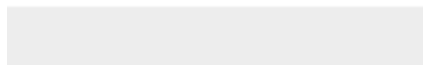

Supplement: pone.0249247.s003.pdf [file pone.0249247.s003.pdf]
