# Supplementary material for: Seroprevalence of COVID-19 infection in a rural district of South India: A population-based seroepidemiological study
Source: PubMed Central journal article supplement (PMC8011723; doi:10.1371/journal.pone.0249247), 2021-03-31
Supplement: pone.0249247.s005.pdf [file pone.0249247.s005.pdf]

# PLOS ONE

## Seroprevalence of COVID-19 infection in a rural district of South India: a population-based seroepidemiological study --Manuscript Draft--

|                                |                                                                                                                                                                                                                                                                                                                                                                                                                                                                                                                                                                                                                                                                                                                                                                                                                                                                                                                                                                                                                                                                                                                                                                                                                                                                                                                                                                                                                                                                                                                                                                                                                                                                                                                                                                                                                                                                                                                                                                                                                                                                                                                                                                                                                                      |
|--------------------------------|--------------------------------------------------------------------------------------------------------------------------------------------------------------------------------------------------------------------------------------------------------------------------------------------------------------------------------------------------------------------------------------------------------------------------------------------------------------------------------------------------------------------------------------------------------------------------------------------------------------------------------------------------------------------------------------------------------------------------------------------------------------------------------------------------------------------------------------------------------------------------------------------------------------------------------------------------------------------------------------------------------------------------------------------------------------------------------------------------------------------------------------------------------------------------------------------------------------------------------------------------------------------------------------------------------------------------------------------------------------------------------------------------------------------------------------------------------------------------------------------------------------------------------------------------------------------------------------------------------------------------------------------------------------------------------------------------------------------------------------------------------------------------------------------------------------------------------------------------------------------------------------------------------------------------------------------------------------------------------------------------------------------------------------------------------------------------------------------------------------------------------------------------------------------------------------------------------------------------------------|
| <b>Manuscript Number:</b>      | PONE-D-20-39600R1                                                                                                                                                                                                                                                                                                                                                                                                                                                                                                                                                                                                                                                                                                                                                                                                                                                                                                                                                                                                                                                                                                                                                                                                                                                                                                                                                                                                                                                                                                                                                                                                                                                                                                                                                                                                                                                                                                                                                                                                                                                                                                                                                                                                                    |
| <b>Article Type:</b>           | Research Article                                                                                                                                                                                                                                                                                                                                                                                                                                                                                                                                                                                                                                                                                                                                                                                                                                                                                                                                                                                                                                                                                                                                                                                                                                                                                                                                                                                                                                                                                                                                                                                                                                                                                                                                                                                                                                                                                                                                                                                                                                                                                                                                                                                                                     |
| <b>Full Title:</b>             | Seroprevalence of COVID-19 infection in a rural district of South India: a population-based seroepidemiological study                                                                                                                                                                                                                                                                                                                                                                                                                                                                                                                                                                                                                                                                                                                                                                                                                                                                                                                                                                                                                                                                                                                                                                                                                                                                                                                                                                                                                                                                                                                                                                                                                                                                                                                                                                                                                                                                                                                                                                                                                                                                                                                |
| <b>Short Title:</b>            | Seroprevalence of COVID-19 infection in a rural district of South India                                                                                                                                                                                                                                                                                                                                                                                                                                                                                                                                                                                                                                                                                                                                                                                                                                                                                                                                                                                                                                                                                                                                                                                                                                                                                                                                                                                                                                                                                                                                                                                                                                                                                                                                                                                                                                                                                                                                                                                                                                                                                                                                                              |
| <b>Corresponding Author:</b>   | Carolin Elizabeth George<br>Bangalore Baptist Hospital<br>Bangalore, Karnataka INDIA                                                                                                                                                                                                                                                                                                                                                                                                                                                                                                                                                                                                                                                                                                                                                                                                                                                                                                                                                                                                                                                                                                                                                                                                                                                                                                                                                                                                                                                                                                                                                                                                                                                                                                                                                                                                                                                                                                                                                                                                                                                                                                                                                 |
| <b>Keywords:</b>               | COVID-19, seroprevalence, rural seroepidemiology, SARS CoV-2, India                                                                                                                                                                                                                                                                                                                                                                                                                                                                                                                                                                                                                                                                                                                                                                                                                                                                                                                                                                                                                                                                                                                                                                                                                                                                                                                                                                                                                                                                                                                                                                                                                                                                                                                                                                                                                                                                                                                                                                                                                                                                                                                                                                  |
| <b>Abstract:</b>               | <p><b>Objectives</b><br/>We aimed to estimate the seroprevalence of COVID-19 in a rural district of South India, six months after the index case.</p> <p><b>Methodology</b><br/>We conducted a cross-sectional study of 509 adults aged more than 18 years. From all the four subdistricts, two grampanchayats (administrative cluster of 5-8 villages) were randomly selected followed by one village through convenience. The participants were invited for the study to the community-based study kiosk set up in all the eight villages through village health committees. We collected socio-demographic characteristics and symptoms using a mobile application-based questionnaire, and we tested samples for the presence of IgG antibodies for SARS CoV-2 using an electro chemiluminescent immunoassay. We calculated age-gender adjusted and test performance adjusted seroprevalence.</p> <p><b>Results</b><br/>The age-and gender-adjusted seroprevalence was 8.5% (95% CI 6.9%- 10.8%). The unadjusted seroprevalence among participants with hypertension and diabetes was 16.3% (95% CI:9.2-25.8) and 10.7 % (95% CI: 5.5-18.3) respectively. When we adjusted for the test performance, the seroprevalence was 6.1% (95% CI 4.02 -8.17). The study estimated 7 (95% CI 1:4.5 – 1:9) undetected infected individuals for every RT-PCR confirmed case. Infection Fatality Rate (IFR) was calculated as 12.38 per 10000 infections as on 22 October 2020. History of self-reported symptoms and education were significantly associated with positive status (<math>p &lt; 0.05</math>)</p> <p><b>Conclusion</b><br/>A significant proportion of the rural population in a district of south India remains susceptible to COVID-19. A higher proportion of susceptible, relatively higher IFR and a poor tertiary healthcare network stress the importance of sustaining the public health measures and promoting early access to the vaccine are crucial to preserving the health of this population. Low population density, good housing, adequate ventilation, limited urbanisation combined with public, private and local health leadership are critical components of curbing future respiratory pandemics.</p> |
| <b>Order of Authors:</b>       | Leeberk Raja Inbaraj<br>Carolin Elizabeth George<br>Sindhulina Chandrasingh                                                                                                                                                                                                                                                                                                                                                                                                                                                                                                                                                                                                                                                                                                                                                                                                                                                                                                                                                                                                                                                                                                                                                                                                                                                                                                                                                                                                                                                                                                                                                                                                                                                                                                                                                                                                                                                                                                                                                                                                                                                                                                                                                          |
| <b>Response to Reviewers:</b>  | We thank the editor and reviewer for taking the time and going through our manuscript (PONE-D-20-39600). We appreciate the constructive feedback received to improve the quality of the paper. We have addressed the points raised and submitted a revised version of the manuscript with highlights and given our response in the attached document.                                                                                                                                                                                                                                                                                                                                                                                                                                                                                                                                                                                                                                                                                                                                                                                                                                                                                                                                                                                                                                                                                                                                                                                                                                                                                                                                                                                                                                                                                                                                                                                                                                                                                                                                                                                                                                                                                |
| <b>Additional Information:</b> |                                                                                                                                                                                                                                                                                                                                                                                                                                                                                                                                                                                                                                                                                                                                                                                                                                                                                                                                                                                                                                                                                                                                                                                                                                                                                                                                                                                                                                                                                                                                                                                                                                                                                                                                                                                                                                                                                                                                                                                                                                                                                                                                                                                                                                      |
| <b>Question</b>                | <b>Response</b>                                                                                                                                                                                                                                                                                                                                                                                                                                                                                                                                                                                                                                                                                                                                                                                                                                                                                                                                                                                                                                                                                                                                                                                                                                                                                                                                                                                                                                                                                                                                                                                                                                                                                                                                                                                                                                                                                                                                                                                                                                                                                                                                                                                                                      |

## Financial Disclosure

Enter a financial disclosure statement that describes the sources of funding for the work included in this submission. Review the [submission guidelines](#) for detailed requirements. View published research articles from [PLOS ONE](#) for specific examples.

This statement is required for submission and **will appear in the published article** if the submission is accepted. Please make sure it is accurate.

### Unfunded studies

Enter: *The author(s) received no specific funding for this work.*

### Funded studies

Enter a statement with the following details:

- Initials of the authors who received each award
- Grant numbers awarded to each author
- The full name of each funder
- URL of each funder website
- Did the sponsors or funders play any role in the study design, data collection and analysis, decision to publish, or preparation of the manuscript?
- **NO** - Include this sentence at the end of your statement: *The funders had no role in study design, data collection and analysis, decision to publish, or preparation of the manuscript.*
- **YES** - Specify the role(s) played.

\* typeset

## Competing Interests

Use the instructions below to enter a competing interest statement for this submission. On behalf of all authors, disclose any [competing interests](#) that could be perceived to bias this work—acknowledging all financial support and any other relevant financial or non-financial competing interests.

This statement **will appear in the published article** if the submission is accepted. Please make sure it is

Authors were supported by Azim Premji Foundation (<https://azimpremjifoundation.org/>)

This was not a research grant but a philanthropic support for COVID response.

The funders had no role in study design, data collection and analysis, decision to publish, or preparation of the manuscript.

The authors have declared that no competing interests exist.

accurate. View published research articles from [PLOS ONE](#) for specific examples.

**NO authors have competing interests**

Enter: *The authors have declared that no competing interests exist.*

**Authors with competing interests**

Enter competing interest details beginning with this statement:

*I have read the journal's policy and the authors of this manuscript have the following competing interests: [insert competing interests here]*

\* typeset

**Ethics Statement**

Enter an ethics statement for this submission. This statement is required if the study involved:

- Human participants
- Human specimens or tissue
- Vertebrate animals or cephalopods
- Vertebrate embryos or tissues
- Field research

Write "N/A" if the submission does not require an ethics statement.

General guidance is provided below. Consult the [submission guidelines](#) for detailed instructions. **Make sure that all information entered here is included in the Methods section of the manuscript.**

The study was approved by the Ethics Committee of Bangalore Baptist Hospital on 30 June 2020. Written Informed consent was taken from all the participants before data collection.

**Format for specific study types**

**Human Subject Research (involving human participants and/or tissue)**

- Give the name of the institutional review board or ethics committee that approved the study
- Include the approval number and/or a statement indicating approval of this research
- Indicate the form of consent obtained (written/oral) or the reason that consent was not obtained (e.g. the data were analyzed anonymously)

**Animal Research (involving vertebrate animals, embryos or tissues)**

- Provide the name of the Institutional Animal Care and Use Committee (IACUC) or other relevant ethics board that reviewed the study protocol, and indicate whether they approved this research or granted a formal waiver of ethical approval
- Include an approval number if one was obtained
- If the study involved *non-human primates*, add *additional details* about animal welfare and steps taken to ameliorate suffering
- If anesthesia, euthanasia, or any kind of animal sacrifice is part of the study, include briefly which substances and/or methods were applied

**Field Research**

Include the following details if this study involves the collection of plant, animal, or other materials from a natural setting:

- Field permit number
- Name of the institution or relevant body that granted permission

**Data Availability**

Authors are required to make all data underlying the findings described fully available, without restriction, and from the time of publication. PLOS allows rare exceptions to address legal and ethical concerns. See the [PLOS Data Policy](#) and [FAQ](#) for detailed information.

Yes - all data are fully available without restriction

A Data Availability Statement describing where the data can be found is required at submission. Your answers to this question constitute the Data Availability Statement and **will be published in the article**, if accepted.

**Important:** Stating 'data available on request from the author' is not sufficient. If your data are only available upon request, select 'No' for the first question and explain your exceptional situation in the text box.

Do the authors confirm that all data underlying the findings described in their manuscript are fully available without restriction?

**Describe where the data may be found in full sentences. If you are copying our sample text, replace any instances of XXX with the appropriate details.**

- If the data are **held or will be held in a public repository**, include URLs, accession numbers or DOIs. If this information will only be available after acceptance, indicate this by ticking the box below. For example: *All XXX files are available from the XXX database (accession number(s) XXX, XXX).*
- If the data are all contained **within the manuscript and/or Supporting Information files**, enter the following: *All relevant data are within the manuscript and its Supporting Information files.*
- If neither of these applies but you are able to provide **details of access elsewhere**, with or without limitations, please do so. For example:

*Data cannot be shared publicly because of [XXX]. Data are available from the XXX Institutional Data Access / Ethics Committee (contact via XXX) for researchers who meet the criteria for access to confidential data.*

*The data underlying the results presented in the study are available from (include the name of the third party*

Data has been attached as a supporting information (S.2)

|                                                                                                                                                                                                                                         |  |
|-----------------------------------------------------------------------------------------------------------------------------------------------------------------------------------------------------------------------------------------|--|
| <p><i>and contact information or URL).</i></p> <ul style="list-style-type: none"><li>• This text is appropriate if the data are owned by a third party and authors do not have permission to share the data.</li></ul> <p>* typeset</p> |  |
| Additional data availability information:                                                                                                                                                                                               |  |

1 **Title Page**

2 **Type of article: Original research**

3 **Title: Seroprevalence of COVID-19 infection in a rural district of South India: a**  
4 **population-based seroepidemiological study**

---

6 **Leeberk Raja Inbaraj<sup>1</sup>, Carolin Elizabeth George<sup>1\*</sup>, Sindhulina Chandrasingh<sup>2</sup>**

7 **Author affiliations:**

- 8 1. Division of Community Health and Family Medicine, Bangalore Baptist Hospital,  
9 Bangalore, Karnataka, India - 560024  
10 2. Department of Microbiology, Bangalore Baptist Hospital, Bangalore, Karnataka,  
11 India- 560024

12 **\*Corresponding author**

13 Email: [carolinelizabethj@gmail.com](mailto:carolinelizabethj@gmail.com) (CEG)

14

15 Total number of photographs: 0

16 Total number of figures: 1

17 Total number of Tables: 3

18 Word counts

19 For abstract: 298

20 For the text (without references): 3414

21

22

23

24

25

## 26 **Abstract**

### 27 **Objectives**

28 We aimed to estimate the seroprevalence of COVID-19 in a rural district of South India, six  
29 months after the index case.

### 30 **Methodology**

31 We conducted a cross-sectional study of 509 adults aged more than 18 years. From all the four  
32 subdistricts, two grampanchayats (administrative cluster of 5-8 villages) were randomly  
33 selected followed by one village through convenience. The participants were invited for the  
34 study to the community-based study kiosk set up in all the eight villages through village health  
35 committees. We collected socio-demographic characteristics and symptoms using a mobile  
36 application-based questionnaire, and we tested samples for the presence of IgG antibodies for  
37 SARS CoV-2 using an electro chemiluminescent immunoassay. We calculated age-gender  
38 adjusted and test performance adjusted seroprevalence.

### 39 **Results**

40 The age-and gender-adjusted seroprevalence was 8.5% (95% CI 6.9%- 10.8%). The unadjusted  
41 seroprevalence among participants with hypertension and diabetes was 16.3% (95% CI:9.2-  
42 25.8) and 10.7 % (95% CI: 5.5-18.3) respectively. When we adjusted for the test performance,  
43 the seroprevalence was 6.1% (95% CI 4.02 -8.17). The study estimated 7 (95% CI 1:4.5 – 1:9)  
44 undetected infected individuals for every RT-PCR confirmed case. Infection Fatality Rate  
45 (IFR) was calculated as 12.38 per 10000 infections as on 22 October 2020. History of self-  
46 reported symptoms and education were significantly associated with positive status ( $p < 0.05$ )

47



## 48 **Conclusion**

49 A significant proportion of the rural population in a district of south India remains susceptible  
50 to COVID-19. A higher proportion of susceptible, relatively higher IFR and a poor tertiary  
51 healthcare network stress the importance of sustaining the public health measures and  
52 promoting early access to the vaccine are crucial to preserving the health of this population.  
53 Low population density, good housing, adequate ventilation, limited urbanisation combined  
54 with public, private and local health leadership are critical components of curbing future  
55 respiratory pandemics.

56 **Key words :** COVID-19, seroprevalence, rural seroepidemiology, SARS CoV-2, India

57

58

59

60

61

62

63

64

65

66

67

68

69

70

71

72

73

74

## 76 **Introduction**

77 Coronavirus disease (COVID-19) was declared as a global pandemic by the World Health  
78 Organization on 11 March 2020 [1]. Globally, more than 60 million confirmed cases of  
79 COVID-19, including 1,416,292 deaths, have been reported to WHO as of 26 November  
80 2020.[2] India has reported more than 9.2 million cases with more than with 135,223 deaths  
81 and Karnataka- a south Indian state had 894,137 cases with 8,512 deaths as of 26 November  
82 2020 [3,4].

83 There has been substantial evidence that a large proportion of the people infected with SARS  
84 CoV-2 are asymptomatic, but they can infect others. It has been reported based on an analysis  
85 of 21 published reports that asymptomatic cases could account from 5 to 80% [5]. It is crucial  
86 to recognise an infected person early and break the route of transmission to control COVID-  
87 19. However, in reality, they do not require or seek medical attention and contribute to the rapid  
88 spread of the disease [6]. Hence, health authorities cannot totally rely on confirmed cases of  
89 COVID-19 detected by RT-PCR as it could potentially miss asymptomatic and pre-  
90 symptomatic infections for containment measures. In order to overcome this challenge, WHO  
91 and others have recommended population-based seroepidemiological studies to generate data  
92 and to implement containment measures accordingly [7]. These surveys also can give us an  
93 estimation of the proportion of the population still susceptible to the infection as it is assumed  
94 that antibodies provide immunity.

95 Indian Council of Medical Research (ICMR) has conducted a nationwide serosurvey among  
96 21 states and reported a population-weighted seroprevalence of 0.73% between May and June  
97 2020.[8] While a hospital-based survey from Srinagar, northern India has estimated gender-

98 standardised seroprevalence of 3.6% in July 2020 and our study from one of the largest slums  
99 in Bangalore revealed a seroprevalence of 57% in September 2020 [9,10].

100 Community Health Division (CHD) of Bangalore Baptist Hospital has been providing curative  
101 and preventive health services through a Rural Health centre and network of mobile clinics to  
102 residents of Bangalore rural district over a decade. CHD also runs special programs for chronic  
103 diseases, disability rehabilitation and alcohol de-addiction. One of our flagship programs is  
104 home-based rural palliative care program which has benefited numerous patients with terminal  
105 illness ever since it was initiated in 2005. Our grass root workers continued to do home visits  
106 to provide home care, monitor blood pressure and blood sugar, and to educate the community  
107 about COVID-19. However, we had stopped our mobile clinics to reduce the urban-rural  
108 transmission of infection. As there can be considerable variation in the seroprevalence based  
109 on geographical setting and density of the population, knowledge of seroprevalence in this  
110 community help us to conduct a risk-benefit analysis of certain services like mobile clinics,  
111 which improves access to medical care at the cost of spreading the virus to the rural community.  
112 Hence, we designed a community-based cross-sectional study to estimate a seroprevalence in  
113 Bangalore rural district six months after the index case. We also hope the findings of this study  
114 will help the health authorities in disease containment and add valuable data to researchers  
115 across the globe.

## 116 **Materials and methods**

### 117 **Setting**

118 The study was conducted in Bangalore Rural District of Karnataka, a South Indian State. This  
119 district is located close to Bangalore city and is divided into four sub-districts (taluks) and 105-  
120 gram panchayats which are village administrative units (Fig 1). Each gram panchayat has a

121 cluster of 10-15 villages [11]. According to the Indian Census 2011, the population was  
122 9,90,923, and the sex-ratio was 945 females for every male, which is lesser than the state of  
123 the average of 973. The district has a population density of 441 inhabitants per square  
124 kilometre. The villagers are dependent on farming and farming related activities such as cattle  
125 rearing for their income. However, the advent of Special Economic Zone (SEZ) and Bangalore  
126 International Airport in this district, service and Information technology industries are also  
127 booming in the past few years [12]. Health care in the district is delivered through the  
128 Government health system and private practitioners. Apart from primary health care, BBH also  
129 established strong community connections through the formation of village health committees  
130 and linking with the rural self-government.

131 **Fig 1 Pictorial map of Bangalore rural district**

## 132 **Study design and sample size**

133 We designed a cross-sectional seroepidemiological survey in Bangalore rural district based on  
134 the recommendation of WHO as the most appropriate study design [13]. A serosurvey from a  
135 densely populated slum in Mumbai, India reported a seroprevalence 57%, and we assumed a  
136 seroprevalence of 30% (lower risk of transmission in rural areas compared to slums) in the  
137 rural district. We calculated a minimum sample size of 504 with 5% absolute and a design  
138 effect of 1.5 [14].

## 139 **Data collection**

140 Bangalore Rural District consists of four sub-districts which are further divided into  
141 grampanchayats which are village administrative units. From the four sub-districts, we  
142 randomly chose two grampanchayats. In each grampanchayat, a village which is centrally  
143 located was chosen as a sampling unit based on convenience, and a kiosk was set up in one of

144 the trusted community spaces in each village. Our community health workers invited people  
145 (adults  $\geq 18$  years) from houses to give blood samples. If a household refused to participate, then  
146 the next house was approached. In each cluster, mobilisation continued till the desired sample  
147 size was achieved in each village. We aimed to include 63 adults from each of these villages,  
148 adding up to 126 in each sub-district.

149 We met with the village health committees and discussed the purpose of the study and enlisted  
150 their cooperation. Together with the community, we decided that kiosk-based recruitment of  
151 the participants was more practical due to strict restriction on the movement of the people by  
152 the state government. People were also apprehensive about the health team from cities visiting  
153 their homes and increasing the risk of transmission of the disease.

154 We recruited people after explaining the purpose of the study, took written consent and then  
155 interviewed people with a questionnaire by a trained research coordinator who had previous  
156 training in data collection. An Epi-info 7.0 <sup>TM</sup> mobile application-based tool was used to  
157 capture responses offline by the interviewer, and it was later downloaded for analysis.

158 The questionnaire contained questions about demographic information (age, gender, education,  
159 comorbidities such as diabetes, hypertension, lung disease and cancer), history of exposure to  
160 COVID-19 infection (history of being diagnosed as COVID-19 case, interaction and household  
161 contacts with persons with confirmed COVID-19), any history of COVID-19 related symptoms  
162 a month before the survey. After the completion of the interview, our phlebotomists collected  
163 5ml of blood from each participant via venepuncture in a plain vacutainer. They transported it  
164 to BBH laboratory within 5 hours, maintaining the cold chain.

## 165 **Sample processing and analysis**

166 The serum was separated and used to test for antibodies using the Elecsys Anti SARS CoV2  
167 assay, an electro chemiluminescent immunoassay using a recombinant protein representing the

168 nucleocapsid (N) antigen for the determination of high-affinity antibodies (including IgG)  
169 against SARS CoV2 [15]. This assay employs a cut-off index (COI) that is automatically  
170 calculated from two calibration standards—a COI of 1.0 or more is considered  
171 reactive/positive, and a COI less than or equal to 1.0 is reported as nonreactive/negative. The  
172 assay sensitivity and specificity were reported to be 97.2% (95.4–98.4) and 99.8% (99.3–100)  
173 respectively, in samples taken 30 days or more post symptom onset. [16] A unique  
174 identification number was used to link the interview information and laboratory results.

## 175 **Statistical analysis**

176 We used Statistical Package for the Social Sciences version 20.0 and STATA version 15.0 for  
177 statistical analysis. The frequency of characteristics of the survey participants was described.  
178 Unadjusted seroprevalence of COVID-19 IgG antibody was reported in per cent with 95%  
179 confidence interval (CI). We used rural area figures of Karnataka from the Sample Registration  
180 System (SRS) statistical report 2018 to calculate weights for reporting age-and-gender  
181 standardised seroprevalence [17] (S.1 Table).

182 Case-to-undetected-infections ratio (CIR), was calculated as a ratio of the number of reported  
183 RT-qPCR-confirmed COVID-19 cases two weeks before the initiation of serosurvey to the  
184 number of people who have antibodies in our study. This was based on an earlier study reported  
185 median seroconversion times for total antibodies, IgM and then IgG at day-11, day-12 and day-  
186 14, respectively based on hospitalised patients and seroconversion for IgG and IgM is reported  
187 to occur simultaneously or sequentially [18, 19]. Assuming a three-week lag time from  
188 infection to death, we considered the reported number of fatalities after three weeks of the  
189 survey to estimate the plausible range of the infection fatality ratio (IFR) [16]. It was calculated  
190 as the number of deaths reported upon the total number of people with high-affinity antibodies  
191 per 10000 infections. We used a projected population of 2020 Bangalore rural district using

192 2011 census data prepared by Directorate of Economics and statistics, Bangalore 2013 to  
193 calculate all these parameters. [20] The association of seroprevalence with comorbid conditions  
194 and socio-demographic characteristics was tested using chi-square tests.

## 195 **Ethical consideration**

196 The Ethics Committee on Bangalore Baptist Hospital approved the survey protocol on 30 June  
197 2020. Written informed consent was obtained from the participants, and the test results were  
198 communicated to them.

## 199 **Results**

200 Our 509 participants were almost equally distributed in four taluks (Doddaballapur – 28.6%,  
201 Devanahalli -23.5%, Nelamangala – 25.7%, Hoskote -20.2%) of Bangalore rural district. The  
202 mean age was 47.0 +/- 16.4 years, and the majority were men (52.3%). Most people (86.0%)  
203 had less than 12 years of education, and 28.4 % were either not working or homemakers.  
204 Hypertension (20.2%) and diabetes (16.9 %) were reported as the most common comorbidities.  
205 (Table 1). Among 509 individuals, 7/509 (1.37%) had at least one symptom suggestive of  
206 COVID-19 in the last three months before the interview, 5/509 (0.98%) reported a history of  
207 an infected family member, and none of them gave a history exposure to an infected person in  
208 the past or tested positive for COVID-19

209

## 210 **Table 1 Socio-demographic Characteristics of the study population**

211

212

213

| Demographics  | Variables           | N   | Percentage<br>215 |
|---------------|---------------------|-----|-------------------|
| Age Group     | ≤20                 | 18  | 3.5               |
|               | 21-40               | 177 | 34.8 216          |
|               | 41-60               | 208 | 40.9              |
|               | >60                 | 106 | 20.8 217          |
| Sex           | Male                | 266 | 52.3              |
|               | Female              | 243 | 47.7 218          |
| Education     | Illiterate          | 125 | 24.6              |
|               | Primary             | 96  | 18.9 219          |
|               | Middle school       | 05  | 1.0               |
|               | High School         | 117 | 23.0 220          |
|               | PUC/Diploma         | 95  | 18.7              |
|               | Degree              | 71  | 13.9 221          |
| Occupation    | Housewife           | 58  | 11.4              |
|               | Domestic Helper     | 12  | 2.4 222           |
|               | Daily wage labourer | 49  | 9.6               |
|               | Notworking          | 87  | 17.1 223          |
|               | Professional        | 81  | 15.9 224          |
|               | Others              | 61  | 12.0              |
| Comorbidities | Diabetes            | 103 | 20.2 225          |
|               | Hypertension        | 86  | 16.9              |

226

227

228 The overall seroprevalence of COVID-19 was 12.4% (95 % CI 9.6-15.6) (Table 2) The age-  
229 and gender-adjusted seroprevalence was 8.5% (95% CI 6.9%- 10.8%) (S.1 Table). The  
230 unadjusted seroprevalence among participants with hypertension and diabetes was 16.3% (95%  
231 CI:9.2-25.8) and 10.7 % (95% CI: 5.5-18.3) respectively, but the association with seropositivity  
232 was not significant. Among seropositive individuals, one participant reported a history of a  
233 family member being positive in the last three months before the interview. The majority



234 (92.0%) of the seropositive individuals, did not report any symptom related to COVID-19  
 235 infection at the time of the study nor in the past.

236 **Table 2 Unadjusted Seroprevalence of COVID-19 in Bangalore rural district, India.**

237

|              | <b>Categor<br/>y</b> | <b>Male</b> | <b>Prevalence<br/>(95% CI)</b> | <b>Fem<br/>ale</b> | <b>Prevalence<br/>(95% CI)</b> | <b>Total</b> | <b>Overall<br/>prevalence<br/>(95% CI)</b> |
|--------------|----------------------|-------------|--------------------------------|--------------------|--------------------------------|--------------|--------------------------------------------|
| Age<br>(yrs) | ≤20                  | 10          | 10 (0.3-44.5)                  | 8                  | 0                              | 18           | 5.6 (0.1 -27.3)                            |
|              | 21-40                | 86          | 10.5 (4.9-18.9)                | 91                 | 16.5 (9.5-25.7)                | 177          | 13.6 (8.9- 19.5)                           |
|              | 41-60                | 120         | 13.3 (7.8-20.7)                | 88                 | 11.4(5.6 -19.9)                | 208          | 12.5 (8.3-17.8)                            |
|              | >60                  | 50          | 12.0 (4.5-24.3)                | 56                 | 10.7 (4.0 – 21.9)              | 106          | 11.3 (6.0 -18.9)                           |
|              | Total                | 266         | 12.0 (8.4- 16.6)               | 243                | 12.0 (8.8- 17.6)               |              | 12.4 (9.6-15.6)                            |

238

239 We estimated that the cumulative number of SARS CoV-2 (Severe acute respiratory syndrome  
 240 coronavirus 2) infection in Bangalore rural district was 96,874 (95% CI 78638- 123086) during  
 241 two weeks before the beginning of the study (17 September to 1 October 2020). When we  
 242 adjusted for sensitivity and specificity of the test kit, the seroprevalence was 6.1% (95% CI  
 243 4.02 -8.17) and the cumulative number of infections was 69,521 (95% CI 45815 – 92315).

244 The cumulative number of RT-PCR confirmed cases till 2 October was 100,54 in Bangalore  
 245 rural district. The study estimated 7 (96,854/100,54) undetected infected individuals for every  
 246 RT-PCR (Reverse Transcription Polymerase Chain Reaction) confirmed case, i.e., case-to-  
 247 undetected-infections ratio (CIR) of 1:7 and CIR could range from 1:4.5 to 1:9. Based on age-  
 248 gender adjusted seroprevalence rate, the Infection Fatality Rate (IFR) was calculated as 12.38  
 249 per 100,00 infections as on 22 October 2020 in Bangalore rural district.

250 Age, gender, occupation, presence of comorbidities were not associated with positive status (p-  
 251 value >0.05). In contrast, the history of at least one self-reported symptoms suggestive of

252 COVID-19 in the last three months before the study (71.4% Vs 11.6%) and higher  
 253 education(15.6% Vs 8.4%) were significantly associated with seropositivity (Table 3).

254 **Table 3 Factors associated with seropositivity of COVID-19**

| Factors                                                | Categories               | Serological status |               | Total | p value                                                                                    |
|--------------------------------------------------------|--------------------------|--------------------|---------------|-------|--------------------------------------------------------------------------------------------|
|                                                        |                          | Reactive           | Non- Reactive |       |                                                                                            |
| Age in years                                           | <=40                     | 25 (12.8)          | 170 (87.2)    | 195   | 0.81                                                                                       |
|                                                        | >40                      | 38 (12.1)          | 276 (87.9)    | 314   |                                                                                            |
| Gender                                                 | Male                     | 32 (12)            | 234 (88)      | 266   | 0.8                                                                                        |
|                                                        | Female                   | 31 (12.8)          | 212 (87.2)    | 243   |                                                                                            |
| Education                                              | Lower (<=8 years)        | 19 (8.4)           | 207 (91.6)    | 226   | 0.01*                                                                                      |
|                                                        | Higher (>8 years)        | 44 (15.6)          | 239 (84.4)    | 263   |                                                                                            |
| Occupation                                             | Farmer/Daily wage labour | 21 (10)            | 189 (90)      | 210   | 0.71                                                                                       |
|                                                        | Others                   | 42 (14)            | 257 (86)      | 299   |                                                                                            |
| Hypertension                                           | Yes                      | 14 (16.3)          | 72 (83.7)     | 86    | 0.22                                                                                       |
|                                                        | No                       | 49 (11.6)          | 374 (88.4)    | 423   |                                                                                            |
| Diabetes                                               | Yes                      | 11 (10.7)          | 92 (89.3)     | 103   | 0.5                                                                                        |
|                                                        | No                       | 52 (12.8)          | 354 (87.2)    | 406   |                                                                                            |
| No. of rooms in the house                              | <=2                      | 63 (12.6)          | 438 (87.4)    | 501   | 0.28                                                                                       |
|                                                        | >2                       | 0                  | 8 (100)       | 8     |                                                                                            |
| History of at least one symptom suggestive of COVID-19 | Yes                      | 5 (71.4)           | 2 (28.6)      | 7     | 0.00  |
|                                                        | No                       | 58 (11.6)          | 444 (88.4)    | 502   |                                                                                            |

255 \*significant p value

256

## 257 **Discussion**

258 Our study revealed that a large proportion of the rural population remains susceptible to  
259 infection and far from reaching the seroprevalence required for herd immunity. A serosurvey  
260 from Karnataka during the same period (3- 16 September) has reported a slightly higher  
261 seroprevalence of 15.2% in the same district [21]. The variation can be attributed to samples  
262 collected from multiple settings, including hospital settings and among the high-risk group.

263 The low prevalence in this rural district is in contrast to an earlier study by the same  
264 investigators that was conducted in a dense urban slum in Bangalore City, which showed a  
265 seroprevalence of 57%.[9] This is expected as the participants in the current study, lived in  
266 sparsely populated villages, in well-ventilated houses and with the privilege of less polluted  
267 air. When the government-imposed lockdown, the adequacy of minimal resources for  
268 sustenance and the self-reliance of the villages, reduced travel to cities a minimum. These  
269 factors would have limited the spread of the infection.

270 Our study estimated that there were 5 to 9 undetected infected individuals for every RT-PCR  
271 confirmed case. This shows that most of the infections were picked up the existing testing  
272 infrastructure. CIR in Bangalore rural district was close to reported estimates of Bangalore city  
273 (1.10), can be accounted to its proximity to the city [21]. CIR reported in this study, is much  
274 lower than other studies in the western countries, probably due to high testing rate in India  
275 during recent months [8,18]. However, slums from Bangalore city reported a high CIR of 1:195  
276 as compared to rural counterparts. Poor health infrastructure and high prevalence of stigma  
277 leading to underreporting may be the reason for high CIR in slums.[9]

278 We found age and comorbidities were not significantly associated with seropositivity. Though  
279 advanced age and comorbidities are associated with severe illness, there is limited data  
280 regarding increased COVID-19 susceptibility with mild asymptomatic cases [22]. The

281 hospital-based study from Srinagar found that people between the age group of 30-69 years  
282 had higher odds of being seropositive (IgG) as compared to the younger population, but they  
283 did not find any gender difference in seropositivity [10]. However, the nationwide survey  
284 showed male gender was significantly associated with seropositivity than females [8]. Age and  
285 gender have a profound influence on mobility and is varied across cultures. Hence the  
286 susceptibility to infection can be attributed to the function of mobility rather than age and  
287 gender per se.

288 Though diabetes has been associated with increased mortality in COVID-19, the susceptibility  
289 to the infection may be same as the general population [23]. The same was reflected in our  
290 study. Though rural, this population had access to diagnosis and treatment of common  
291 comorbidities due to the outreach of the public-spirited hospital and the government health  
292 system. Access to chronic medications was facilitated even during the lockdown and intense  
293 resource reallocation following COVID-19, through our grass-root health workers who  
294 delivered medicines at home for people with chronic diseases to keep their diseases under  
295 control. We could imply that the efforts to sensitise the public regarding COVID-19 by the  
296 government and private sectors in sensitisation have played a valuable role.

297 We estimated an IFR of 12.8 per 10000 infections or 0.13%, which is comparable to what is  
298 reported from the Indian subcontinent (0.27-1.03) and other countries like USA (0.12-0.2%)  
299 Iran (0.08-0.12%), Brazil and Spain (1%) [8,21,24]. Estimating IFR is a challenge as it will  
300 depend on infection rate (seroprevalence) and the robustness of system capturing mortality.  
301 Both variables have estimation challenges of varying degrees in different parts of India. Since  
302 there are only a handful of studies estimating seroprevalence, we have only limited studies to  
303 compare. IFR reported in a study conducted in a Bangalore slum during the same period was  
304 absurdly low (0.03%), which can be attributed to under-reporting of deaths rather than reduced  
305 fatality in urban slums [9].

306 We could draw several implications from the findings of the study. First and foremost, rural  
307 areas succeeded in halting the spread of infection to a greater extent as compared to cities.  
308 However, rural areas are challenged by the poor health system and low cash economy,  
309 distancing itself from urbanisation reaped overall health benefits to people in villages, in terms  
310 of the number of infections. This is a reminder that guarded urbanisation preserving the natural  
311 ecosystem is an essential determinant of health.

312 Secondly, strict containment strategies like lockdown curbed infection without profound  
313 livelihood implication in this rural setting. This was possible because of the strength of the  
314 local economy and reduced inequities. The villages had enough seasonal grains (ragi, a millet),  
315 homegrown vegetables and dairy products for nourishment. Since the population density was  
316 less, there was enough water for the increased demand for handwashing, clean air to breathe,  
317 and physical distancing was a practical possibility. Strong social connections, a powerful rural  
318 disposition added value during COVID-19 infections. Neighbourhoods took care of infected  
319 households with food and essential medicines and arranged for a referral if they need hospital  
320 support.

321 Thirdly, low seroprevalence should be looked in two ways. One way to look at this  
322 'achievement', success in preventing the spread and the other way to look at it as 'responsibility'  
323 due to susceptibility. Since we assume that other villages in India have similar or a slightly  
324 lesser seroprevalence, we need to keep in mind 'huge susceptible burden' as 68.84% of India's  
325 population live in villages according to the census (2011) [25]. This has potential to staggering  
326 peaks and gives a warning signal for policymakers about the possibilities of multiple waves of  
327 the pandemic. In this context, discussion on sustaining safety measures and access to  
328 vaccination is of paramount importance.

329 The study has potential biases. Though all the subdistricts were selected, and subsequently  
330 villages were randomly selected, we employed convenience sampling at the village level.  
331 Villages were apprehensive about the medical team from the city, and hence we enrolled based  
332 on individual preference. This would have resulted in selection bias; however, we tried to  
333 reduce the bias by calculating age-gender adjusted seroprevalence. Another possibility is the  
334 occurrence of measurement bias in estimating seroprevalence. Since we have not done RT-  
335 PCR, we would have missed the current infection and underestimated the prevalence.  
336 Measurement bias can also be due to validity parameters of the test, which we have addressed  
337 through test performance adjusted seroprevalence.

338 There are many strengths to this study. This is one of the earliest population-based  
339 seroprevalence study conducted in a rural district of India harbouring a million people. This  
340 contributes to the body of evidence regarding the virus, its spread and the future implications  
341 in the rural context. The study being conducted by researchers who knows the population  
342 closely is an added advantage as the results are discussed in relation to the contextual realities.

343 This study has a few limitations. We did not follow a strict probability sampling technique due  
344 to feasibility reasons. Another limitation is that we did not estimate the current infection using  
345 RT-PCR. Both these aspects have an effect on the true estimation of seroprevalence in this  
346 community. Though a 15 days recall period is generally recommended for eliciting morbidity,  
347 we have used a longer (3 months) recall. Our assumption was that people would recall their  
348 symptoms related to COVID for a longer period due to the unusually significant nature of this  
349 pandemic and the attention it had received from media. However, this could have resulted in  
350 recall bias. Another limitation is that we have limited our research to one rural district; hence  
351 the generalisation of the findings has to be done with caution.

352

## 353 **Conclusion**

354 We found a low seroprevalence of COVID-19 infection among rural population in a district of  
355 South India, six months after the index case. The age-old public health measures of low  
356 population density, good housing, adequate ventilation, hygiene measures combined with the  
357 public, private and local health leadership limited the spread of an infectious respiratory viral  
358 pathogen in this low resource setting. Since more than three fourth of the rural population  
359 remains susceptible to COVID-19, sustaining public health measures and promoting access to  
360 vaccination is of utmost importance to safeguard the health this population as severe COVID-  
361 19 can be overtly burdensome owing to poor tertiary healthcare landscape of the rural setting.

## 362 **References**

- 363 1. WHO characterizes COVID-19 as Pandemic [Internet] 2019 Mar 11 [cited on 2020  
364 Dec 16]; Available from: [https://www.who.int/emergencies/diseases/novel-](https://www.who.int/emergencies/diseases/novel-coronavirus-2019/events-as-they-happen)  
365 [coronavirus-2019/events-as-they-happen](https://www.who.int/emergencies/diseases/novel-coronavirus-2019/events-as-they-happen)
- 366 2. WHO Coronavirus Disease (COVID-19) Dashboard [Internet]. 2020 Nov 26 [Cited  
367 on 2020 Nov 26]; Available from: <https://covid19.who.int>
- 368 3. WHO Indian situation [Internet]. 2020 Nov 26 [Cited on 2020 Nov 26]; Available  
369 from: <https://covid19.who.int/region/searo/country/in>
- 370 4. Karnataka Covid-19 Dashboard [Internet].2020 Nov 26 [Cited on 2020 Nov 26];  
371 Available from; <https://covid19.karnataka.gov.in/covid-dashboard/dashboard.html>
- 372 5. Yanes-Lane M, Winters N, Fregonese F, Bastos M, Perlman-Arrow S, Campbell JR et  
373 al. Proportion of asymptomatic infection among COVID-19 positive persons and their  
374 transmission potential: A systematic review and meta-analysis. PLoS One. 2020 Nov  
375 3;15(11):e0241536
- 376 6. Gao Z, Xu Y, Sun C, Wang X, Guo Y, Qiu S, et al. A Systematic Review of  
377 Asymptomatic Infections with COVID-19. J Microbiol Immunol Infect. 2020 15  
378 May;1-6
- 379 7. World Health Organization. Coordinated global research roadmap: 2019 novel  
380 coronavirus; March 2020. Geneva: WHO; 2020.
- 381 8. Murhekar MV, Bhatnagar T, Selvaraju S, Rade K, Saravanakumar V, Vivian

- 382 Thangaraj JW, et al. Prevalence of SARS-CoV-2 infection in India: Findings from the  
383 national serosurvey, May-June 2020. *Indian J Med Res.* 2020 Aug;152(1 & 2):48–60.
- 384 9. George CE, Inbaraj LR, Chandrasingh S, de Witte LP. High seroprevalence of  
385 COVID-19 infection in a large slum in South India; what does it tell us about  
386 managing a pandemic and beyond? *Epidemiol Infect.* 2021;149:e39
- 387 10. Khan SMS, Qurieshi MA, Haq I, Majid S, Bhat AA, Nabi S, et al. Seroprevalence of  
388 SARS-CoV-2 specific IgG antibodies in District Srinagar, northern India - A cross-  
389 sectional study. *PLoS One.* 2020;15(11):e0239303.
- 390 11. Bangalore rural district demography [Internet]. [cited on 2020 Dec 16]; Available  
391 from: <https://bangalorerural.nic.in/en/demography/>
- 392 12. Bangalore Rural district [Internet]. [Cited on 2020 16 December]; Available from:  
393 [https://en.wikipedia.org/wiki/Bangalore\\_Rural\\_district](https://en.wikipedia.org/wiki/Bangalore_Rural_district)
- 394 13. Population-based age-stratified seroepidemiological investigation protocol for  
395 coronavirus 2019 (COVID-19) infection [Internet]. 2020 May 26 [Cited on 2020 Dec  
396 16]; Available from: <https://www.who.int/publications/i/item/WHO-2019-nCoV-Seroepidemiology-2020.2>
- 397
- 398 14. Malani A, Shah D, Kang G, Lobo GN, Shastri J, Mohanan M, et al. Seroprevalence of  
399 SARS-CoV-2 in slums versus non-slums in Mumbai, India. *Lancet Glob Health.* 2020  
400 Nov 13;
- 401 15. Elecsys Anti-SARS-CoV-2 [Internet]. [Cited on 2020 Dec 16]; Available from:  
402 <https://www.fda.gov/media/137605/download>
- 403 16. National SARS-CoV-2 Serology Assay Evaluation Group. Performance  
404 characteristics of five immunoassays for SARS-CoV-2: a head-to-head benchmark  
405 comparison. *Lancet Infect Dis.* 2020;20(12):1390–400.
- 406 17. Sample Registration System (SRS) Bulletins [Internet]. [Cited on 2020 Dec  
407 16]; Available from:  
408 [https://censusindia.gov.in/vital\\_statistics/SRS\\_Bulletins/Bulletins.html](https://censusindia.gov.in/vital_statistics/SRS_Bulletins/Bulletins.html)
- 409 18. Zhao J, Yuan Q, Wang H, Liu W, Liao X, Su Y et al. Antibody Responses to SARS-  
410 CoV-2 in Patients With Novel Coronavirus Disease 2019. *Clin Infect Dis.*  
411 2020;71(16):2027-2034
- 412 19. Long QX, Liu BZ, Deng HJ, Wu GC, Deng K, Chen YK, et al. Antibody responses to  
413 SARS-CoV-2 in patients with COVID-19. *Nature Medicine* 2020; 26: 845-8



- 414 20. Projected population of Karnataka 2012-2021, Directorate of Economics and  
415 Statistics Bangalore 2013 [Internet]. [Cited on 2020 16 December]; Available from:  
416 <https://des.kar.nic.in/docs/Projected%20Population%202012-2021.pdf>
- 417 21. Babu GR, Sundaresan R, Athreya S, Akhtar J, Pandey PK, Maroor SP et al. The  
418 burden of active infection and anti-SARS-CoV-2 IgG antibodies in the general  
419 population: Results from a statewide survey in Karnataka, India. medRxiv 2020. doi:  
420 <https://doi.org/10.1101/2020.12.04.20243949>
- 421 22. Vahidy FS, Nicolas JC, Meeks JR, Khan O, Pan A, Jones SL, et al. Racial and ethnic  
422 disparities in SARS-CoV-2 pandemic: analysis of a COVID-19 observational registry  
423 for a diverse US metropolitan population. *BMJ Open*. 2020 Aug 11;10(8):e039849.  
424 doi: 10.1136/bmjopen-2020-039849.
- 425 23. Hussain A, Bhowmik B, do Vale Moreira NC. COVID-19 and diabetes: Knowledge  
426 in progress. *Diabetes Res Clin Pract*. 2020;162:108142.  
427 doi:10.1016/j.diabres.2020.108142
- 428 24. Mallapaty S. How deadly is the coronavirus? Scientists are close to an answer.  
429 *Nature*. 2020 Jun;582(7813):467-468. doi: 10.1038/d41586-020-01738-2.
- 430 25. Office of the Registrar General & Census Commissioner, India, Villages By  
431 Population in English [Internet]. [cited on 2020 16 December]. Available  
432 from: [https://censusindia.gov.in/2011census/population\\_enumeration.html](https://censusindia.gov.in/2011census/population_enumeration.html)

433

## 434 **Availability of data and materials**

435 Available as a part of the manuscript in the supporting information (S.2)

## 436 **Funding**

437 Azim Premji Foundation, Bangalore, India

## 438 **Conflict of interest**

439 CEG, LRI, SC declare no conflict of interest

## 440 **Authors' contributions**

441 LRI contributed to the conception and design of work, acquisition, analysis and interpretation  
442 of data, and was the primary contributor to the draft paper and revisions. CEG contributed to  
443 the conception, study design, developed the study tool, supervised data collection, participated  
444 in analysis and interpretation, contributed to the writing of the article. SC contributed to the  
445 conception, supervised and validated the blood analysis. All authors revised the work for  
446 important intellectual content and agreed to be accountable for all aspects of the work. All  
447 authors read and approved the final manuscript.

## 448 **Acknowledgement**

449 We would like to thank Mr Tata Rao creating Epi-data for data collection, conducting  
450 preliminary analysis and his help with referencing, and data collection. We also acknowledge  
451 the support of Ms Sangeetha and Mr Prakash in their assistance in data collection. We would  
452 like to extend our thanks Dr Arun, Epidemiologist from Christian Medical College, Vellore for  
453 his help during statistical analysis. We are grateful for the support of people Bangalore rural  
454 district for their participation in the study.

## 455 **Supporting Information**

456 **S.1 Table Age- and gender-standardized seroprevalence.**

457

458 **S.2 File Data**

459

460

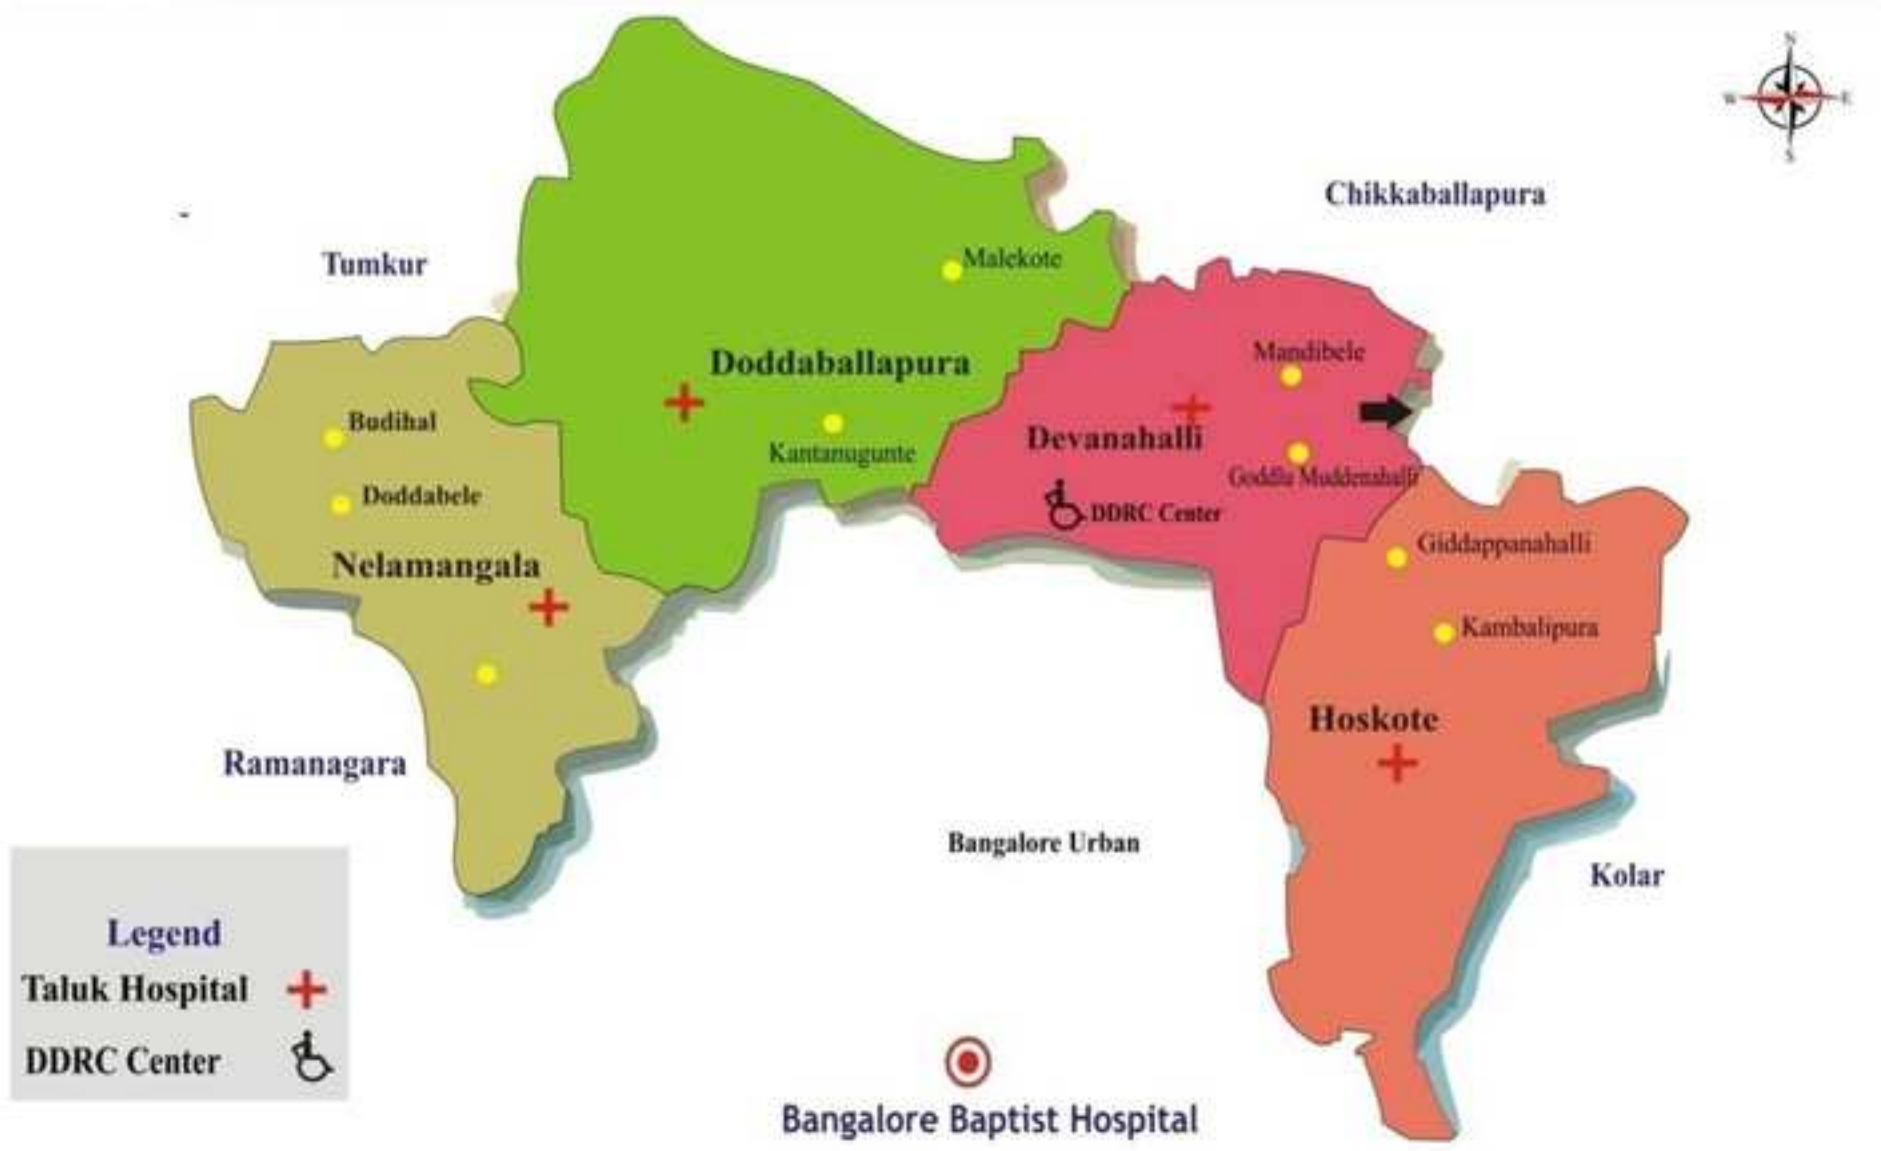

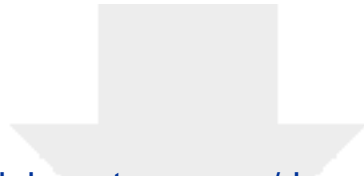

Click here to access/download

**Supporting Information**

journal.pone.0239303.s005 (2).log

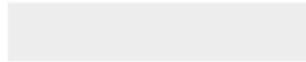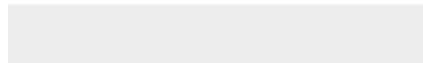

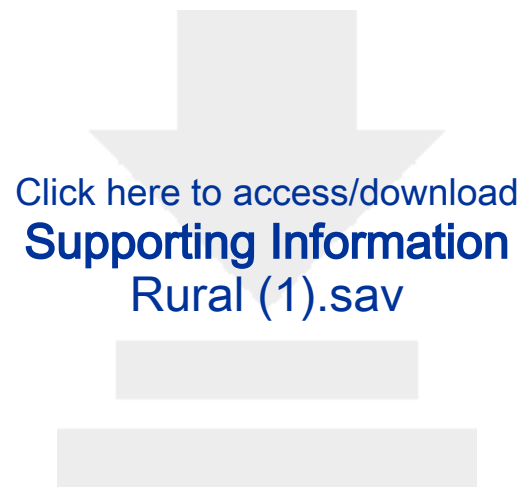

1 **Title Page**

2 **Type of article: Original research**

3 **Title: Seroprevalence of COVID-19 infection in a rural district of South India: a**  
4 **population-based seroepidemiological study**

---

6 **Leeberk Raja Inbaraj<sup>1</sup>, Carolin Elizabeth George<sup>1\*</sup>, Sindhulina Chandrasingh<sup>2</sup>**

7 **Author affiliations:**

- 8 1. Division of Community Health and Family Medicine, Bangalore Baptist Hospital,  
9 Bangalore, Karnataka, India - 560024  
10 2. Department of Microbiology, Bangalore Baptist Hospital, Bangalore, Karnataka,  
11 India- 560024

12 **\*Corresponding author**

13 Email: [carolinelizabethj@gmail.com](mailto:carolinelizabethj@gmail.com) (CEG)

14  
15 Total number of photographs: 0

16 Total number of figures: 1

17 Total number of Tables: 3

18 **Word counts**

19 For abstract: 298

20 For the text (without references): 3414

## 26 **Abstract**

### 27 **Objectives**

28 We aimed to estimate the seroprevalence of COVID-19 in a rural district of South India, six  
29 months after the index case.

### 30 **Methodology**

31 We conducted a cross-sectional study of 509 adults aged more than 18 years. From all the four  
32 subdistricts, two grampanchayats (administrative cluster of 5-8 villages) were randomly  
33 selected followed by one village through convenience. The participants were invited for the  
34 study to the community-based study kiosk set up in all the eight villages through village health  
35 committees. We collected socio-demographic characteristics and symptoms using a mobile  
36 application-based questionnaire, and we tested samples for the presence of IgG antibodies for  
37 SARS CoV-2 using an electro chemiluminescent immunoassay. We calculated age-gender  
38 adjusted and test performance adjusted seroprevalence.

### 39 **Results**

40 The age-and gender-adjusted seroprevalence was 8.5% (95% CI 6.9%- 10.8%). The unadjusted  
41 seroprevalence among participants with hypertension and diabetes was 16.3% (95% CI:9.2-  
42 25.8) and 10.7 % (95% CI: 5.5-18.3) respectively. When we adjusted for the test performance,  
43 the seroprevalence was 6.1% (95% CI 4.02 -8.17). The study estimated 7 (95% CI 1:4.5 – 1:9)  
44 undetected infected individuals for every RT-PCR confirmed case. Infection Fatality Rate  
45 (IFR) was calculated as 12.38 per 10000 infections as on 22 October 2020. **History of self-**  
46 **reported symptoms and education were significantly associated with positive status (p < 0.05)**

47

## 48 **Conclusion**

49 A significant proportion of the rural population in a district of south India remains susceptible  
50 to COVID-19. A higher proportion of susceptible, relatively higher IFR and a poor tertiary  
51 healthcare network stress the importance of sustaining the public health measures and  
52 promoting early access to the vaccine are crucial to preserving the health of this population.  
53 Low population density, good housing, adequate ventilation, limited urbanisation combined  
54 with public, private and local health leadership are critical components of curbing future  
55 respiratory pandemics.

56 **Key words:** COVID-19, seroprevalence, rural seroepidemiology, SARS CoV-2, India

57

58

59

60

61

62

63

64

65

66

67

68

69

70

71

72

73

74



## 76 **Introduction**

77 Coronavirus disease (COVID-19) was declared as a global pandemic by the World Health  
78 Organization on 11 March 2020 [1]. Globally, more than 60 million confirmed cases of  
79 COVID-19, including 1,416,292 deaths, have been reported to WHO as of 26 November  
80 2020.[2] India has reported more than 9.2 million cases with more than with 135,223 deaths  
81 and Karnataka- a south Indian state had 894,137 cases with 8,512 deaths as of 26 November  
82 2020 [3,4].

83 There has been substantial evidence that a large proportion of the people infected with SARS  
84 CoV-2 are asymptomatic, but they can infect others. It has been reported based on an analysis  
85 of 21 published reports that asymptomatic cases could account from 5 to 80% [5]. It is crucial  
86 to recognise an infected person early and break the route of transmission to control COVID-  
87 19. However, in reality, they do not require or seek medical attention and contribute to the rapid  
88 spread of the disease [6]. Hence, health authorities cannot totally rely on confirmed cases of  
89 COVID-19 detected by RT-PCR as it could potentially miss asymptomatic and pre-  
90 symptomatic infections for containment measures. In order to overcome this challenge, WHO  
91 and others have recommended population-based seroepidemiological studies to generate data  
92 and to implement containment measures accordingly [7]. These surveys also can give us an  
93 estimation of the proportion of the population still susceptible to the infection as it is assumed  
94 that antibodies provide immunity.

95 Indian Council of Medical Research (ICMR) has conducted a nationwide serosurvey among  
96 21 states and reported a population-weighted seroprevalence of 0.73% between May and June  
97 2020.[8] While a hospital-based survey from Srinagar, northern India has estimated gender-

98 standardised seroprevalence of 3.6% in July 2020 and our study from one of the largest slums  
99 in Bangalore revealed a seroprevalence of 57% in September 2020 [9,10].

100 Community Health Division (CHD) of Bangalore Baptist Hospital has been providing curative  
101 and preventive health services through a Rural Health centre and network of mobile clinics to  
102 residents of Bangalore rural district over a decade. CHD also runs special programs for chronic  
103 diseases, disability rehabilitation and alcohol de-addiction. One of our flagship programs is  
104 home-based rural palliative care program which has benefited numerous patients with terminal  
105 illness ever since it was initiated in 2005. Our grass root workers continued to do home visits  
106 to provide home care, monitor blood pressure and blood sugar, and to educate the community  
107 about COVID-19. However, we had stopped our mobile clinics to reduce the urban-rural  
108 transmission of infection. As there can be considerable variation in the seroprevalence based  
109 on geographical setting and density of the population, knowledge of seroprevalence in this  
110 community help us to conduct a risk-benefit analysis of certain services like mobile clinics,  
111 which improves access to medical care at the cost of spreading the virus to the rural community.  
112 Hence, we designed a community-based cross-sectional study to estimate a seroprevalence in  
113 Bangalore rural district six months after the index case. We also hope the findings of this study  
114 will help the health authorities in disease containment and add valuable data to researchers  
115 across the globe.

## 116 **Materials and methods**

### 117 **Setting**

118 The study was conducted in Bangalore Rural District of Karnataka, a South Indian State. This  
119 district is located close to Bangalore city and is divided into four sub-districts (taluks) and 105-  
120 gram panchayats which are village administrative units (Fig 1). Each gram panchayat has a

121 cluster of 10-15 villages [11]. According to the Indian Census 2011, the population was  
122 9,90,923, and the sex-ratio was 945 females for every male, which is lesser than the state of  
123 the average of 973. The district has a population density of 441 inhabitants per square  
124 kilometre. The villagers are dependent on farming and farming related activities such as cattle  
125 rearing for their income. However, the advent of Special Economic Zone (SEZ) and Bangalore  
126 International Airport in this district, service and Information technology industries are also  
127 booming in the past few years [12]. Health care in the district is delivered through the  
128 Government health system and private practitioners. Apart from primary health care, BBH also  
129 established strong community connections through the formation of village health committees  
130 and linking with the rural self-government.

131 **Fig 1 Pictorial map of Bangalore rural district**

## 132 **Study design and sample size**

133 We designed a cross-sectional seroepidemiological survey in Bangalore rural district based on  
134 the recommendation of WHO as the most appropriate study design [13]. A serosurvey from a  
135 densely populated slum in Mumbai, India reported a seroprevalence 57%, and we assumed a  
136 seroprevalence of 30% (lower risk of transmission in rural areas compared to slums) in the  
137 rural district. We calculated a minimum sample size of 504 with 5% absolute and a design  
138 effect of 1.5 [14].

## 139 **Data collection**

140 Bangalore Rural District consists of four sub-districts which are further divided into  
141 grampanchayats which are village administrative units. From the four sub-districts, we  
142 randomly chose two grampanchayats. In each grampanchayat, a village which is centrally  
143 located was chosen as a sampling unit based on convenience, and a kiosk was set up in one of

144 the trusted community spaces in each village. Our community health workers invited people  
145 (adults  $\geq 18$  years) from houses to give blood samples. If a household refused to participate, then  
146 the next house was approached. In each cluster, mobilisation continued till the desired sample  
147 size was achieved in each village. We aimed to include 63 adults from each of these villages,  
148 adding up to 126 in each sub-district.

149 We met with the village health committees and discussed the purpose of the study and enlisted  
150 their cooperation. Together with the community, we decided that kiosk-based recruitment of  
151 the participants was more practical due to strict restriction on the movement of the people by  
152 the state government. People were also apprehensive about the health team from cities visiting  
153 their homes and increasing the risk of transmission of the disease.

154 We recruited people after explaining the purpose of the study, took written consent and then  
155 interviewed people with a questionnaire by a trained research coordinator who had previous  
156 training in data collection. An Epi-info 7.0™ mobile application-based tool was used to  
157 capture responses offline by the interviewer, and it was later downloaded for analysis.

158 The questionnaire contained questions about demographic information (age, gender, education,  
159 comorbidities such as diabetes, hypertension, lung disease and cancer), history of exposure to  
160 COVID-19 infection (history of being diagnosed as COVID-19 case, interaction and household  
161 contacts with persons with confirmed COVID-19), any history of COVID-19 related symptoms  
162 a month before the survey. After the completion of the interview, our phlebotomists collected  
163 5ml of blood from each participant via venepuncture in a plain vacutainer. They transported it  
164 to BBH laboratory within 5 hours, maintaining the cold chain.

## 165 **Sample processing and analysis**

166 The serum was separated and used to test for antibodies using the Elecsys Anti SARS CoV2  
167 assay, an electro chemiluminescent immunoassay using a recombinant protein representing the

168 nucleocapsid (N) antigen for the determination of high-affinity antibodies (including IgG)  
169 against SARS CoV2 [15]. This assay employs a cut-off index (COI) that is automatically  
170 calculated from two calibration standards—a COI of 1.0 or more is considered  
171 reactive/positive, and a COI less than or equal to 1.0 is reported as nonreactive/negative. The  
172 assay sensitivity and specificity were reported to be 97.2% (95.4–98.4) and 99.8% (99.3–100)  
173 respectively, in samples taken 30 days or more post symptom onset. [16] A unique  
174 identification number was used to link the interview information and laboratory results.

## 175 **Statistical analysis**

176 We used Statistical Package for the Social Sciences version 20.0 and STATA version 15.0 for  
177 statistical analysis. The frequency of characteristics of the survey participants was described.  
178 Unadjusted seroprevalence of COVID-19 IgG antibody was reported in per cent with 95%  
179 confidence interval (CI). We used rural area figures of Karnataka from the Sample Registration  
180 System (SRS) statistical report 2018 to calculate weights for reporting age-and-gender  
181 standardised seroprevalence [17] (S.1 Table).

182 Case-to-undetected-infections ratio (CIR), was calculated as a ratio of the number of reported  
183 RT-qPCR-confirmed COVID-19 cases two weeks before the initiation of serosurvey to the  
184 number of people who have antibodies in our study. This was based on an earlier study reported  
185 median seroconversion times for total antibodies, IgM and then IgG at day-11, day-12 and day-  
186 14, respectively based on hospitalised patients and seroconversion for IgG and IgM is reported  
187 to occur simultaneously or sequentially [18, 19]. Assuming a three-week lag time from  
188 infection to death, we considered the reported number of fatalities after three weeks of the  
189 survey to estimate the plausible range of the infection fatality ratio (IFR) [16]. It was calculated  
190 as the number of deaths reported upon the total number of people with high-affinity antibodies  
191 per 10000 infections. We used a projected population of 2020 Bangalore rural district using

192 2011 census data prepared by Directorate of Economics and statistics, Bangalore 2013 to  
193 calculate all these parameters. [20] The association of seroprevalence with comorbid conditions  
194 and socio-demographic characteristics was tested using chi-square tests.

## 195 **Ethical consideration**

196 The Ethics Committee on Bangalore Baptist Hospital approved the survey protocol on 30 June  
197 2020. Written informed consent was obtained from the participants, and the test results were  
198 communicated to them.

## 199 **Results**

200 Our 509 participants were almost equally distributed in four taluks (Doddaballapur – 28.6%,  
201 Devanahalli -23.5%, Nelamangala – 25.7%, Hoskote -20.2%) of Bangalore rural district. The  
202 mean age was 47.0 +/- 16.4 years, and the majority were men (52.3%). Most people (86.0%)  
203 had less than 12 years of education, and 28.4 % were either not working or homemakers.  
204 Hypertension (20.2%) and diabetes (16.9 %) were reported as the most common comorbidities.  
205 (Table 1). Among 509 individuals, 7/509 (1.37%) had at least one symptom suggestive of  
206 COVID-19 in the last three months before the interview, 5/509 (0.98%) reported a history of  
207 an infected family member, and none of them gave a history exposure to an infected person in  
208 the past or tested positive for COVID-19

209

## 210 **Table 1 Socio-demographic Characteristics of the study population**

211

212

213

| Demographics  | Variables           | N   | Percentage<br>215 |
|---------------|---------------------|-----|-------------------|
| Age Group     | ≤20                 | 18  | 3.5               |
|               | 21-40               | 177 | 34.8 216          |
|               | 41-60               | 208 | 40.9              |
|               | >60                 | 106 | 20.8 217          |
| Sex           | Male                | 266 | 52.3              |
|               | Female              | 243 | 47.7 218          |
| Education     | Illiterate          | 125 | 24.6              |
|               | Primary             | 96  | 18.9 219          |
|               | Middle school       | 05  | 1.0               |
|               | High School         | 117 | 23.0 220          |
|               | PUC/Diploma         | 95  | 18.7              |
|               | Degree              | 71  | 13.9 221          |
| Occupation    | Housewife           | 58  | 11.4              |
|               | Domestic Helper     | 12  | 2.4 222           |
|               | Daily wage labourer | 49  | 9.6               |
|               | Notworking          | 87  | 17.1 223          |
|               | Professional        | 81  | 15.9              |
|               | Others              | 61  | 12.0 224          |
| Comorbidities | Diabetes            | 103 | 20.2 225          |
|               | Hypertension        | 86  | 16.9              |

226

227

228 The overall seroprevalence of COVID-19 was 12.4% (95 % CI 9.6-15.6) (Table 2) The age-  
229 and gender-adjusted seroprevalence was 8.5% (95% CI 6.9%- 10.8%) (S.1 Table). The  
230 unadjusted seroprevalence among participants with hypertension and diabetes was 16.3% (95%  
231 CI:9.2-25.8) and 10.7 % (95% CI: 5.5-18.3) respectively, but the association with seropositivity  
232 was not significant. Among seropositive individuals, one participant reported a history of a  
233 family member being positive in the last three months before the interview. The majority

234 (92.0%) of the seropositive individuals, did not report any symptom related to COVID-19  
 235 infection at the time of the study nor in the past.

236 **Table 2 Unadjusted Seroprevalence of COVID-19 in Bangalore rural district, India.**

237

|           | Category | Male | Prevalence (95% CI) | Female | Prevalence (95% CI) | Total | Overall prevalence (95% CI) |
|-----------|----------|------|---------------------|--------|---------------------|-------|-----------------------------|
| Age (yrs) | ≤20      | 10   | 10 (0.3-44.5)       | 8      | 0                   | 18    | 5.6 (0.1 -27.3)             |
|           | 21-40    | 86   | 10.5 (4.9-18.9)     | 91     | 16.5 (9.5-25.7)     | 177   | 13.6 (8.9- 19.5)            |
|           | 41-60    | 120  | 13.3 (7.8-20.7)     | 88     | 11.4(5.6 -19.9)     | 208   | 12.5 (8.3-17.8)             |
|           | >60      | 50   | 12.0 (4.5-24.3)     | 56     | 10.7 (4.0 – 21.9)   | 106   | 11.3 (6.0 -18.9)            |
|           | Total    | 266  | 12.0 (8.4- 16.6)    | 243    | 12.0 (8.8- 17.6)    |       | 12.4 (9.6-15.6)             |

238

239 We estimated that the cumulative number of SARS CoV-2 (Severe acute respiratory syndrome  
 240 coronavirus 2) infection in Bangalore rural district was 96,874 (95% CI 78638- 123086) during  
 241 two weeks before the beginning of the study (17 September to 1 October 2020). When we  
 242 adjusted for sensitivity and specificity of the test kit, the seroprevalence was 6.1% (95% CI  
 243 4.02 -8.17) and the cumulative number of infections was 69,521 (95% CI 45815 – 92315).

244 The cumulative number of RT-PCR confirmed cases till 2 October was 100,54 in Bangalore  
 245 rural district. The study estimated 7 (96,854/100,54) undetected infected individuals for every  
 246 RT-PCR (Reverse Transcription Polymerase Chain Reaction) confirmed case, i.e., case-to-  
 247 undetected-infections ratio (CIR) of 1:7 and CIR could range from 1:4.5 to 1:9. Based on age-  
 248 gender adjusted seroprevalence rate, the Infection Fatality Rate (IFR) was calculated as 12.38  
 249 per 100,00 infections as on 22 October 2020 in Bangalore rural district.

250 Age, gender, occupation, presence of comorbidities were not associated with positive status (p-  
 251 value >0.05). **In contrast, the history of at least one self-reported symptoms suggestive of**



252 COVID-19 in the last three months before the study (71.4% Vs 11.6%) and higher  
 253 education(15.6% Vs 8.4%) were significantly associated with seropositivity (Table 3).

254 **Table 3 Factors associated with seropositivity of COVID-19**

| Factors                                                | Categories               | Serological status |               | Total | p value |
|--------------------------------------------------------|--------------------------|--------------------|---------------|-------|---------|
|                                                        |                          | Reactive           | Non- Reactive |       |         |
| Age in years                                           | <=40                     | 25 (12.8)          | 170 (87.2)    | 195   | 0.81    |
|                                                        | >40                      | 38 (12.1)          | 276 (87.9)    | 314   |         |
| Gender                                                 | Male                     | 32 (12)            | 234 (88)      | 266   | 0.8     |
|                                                        | Female                   | 31 (12.8)          | 212 (87.2)    | 243   |         |
| Education                                              | Lower (<=8 years)        | 19 (8.4)           | 207 (91.6)    | 226   | 0.01*   |
|                                                        | Higher (>8 years)        | 44 (15.6)          | 239 (84.4)    | 263   |         |
| Occupation                                             | Farmer/Daily wage labour | 21 (10)            | 189 (90)      | 210   | 0.71    |
|                                                        | Others                   | 42 (14)            | 257 (86)      | 299   |         |
| Hypertension                                           | Yes                      | 14 (16.3)          | 72 (83.7)     | 86    | 0.22    |
|                                                        | No                       | 49 (11.6)          | 374 (88.4)    | 423   |         |
| Diabetes                                               | Yes                      | 11 (10.7)          | 92 (89.3)     | 103   | 0.5     |
|                                                        | No                       | 52 (12.8)          | 354 (87.2)    | 406   |         |
| No. of rooms in the house                              | <=2                      | 63 (12.6)          | 438 (87.4)    | 501   | 0.28    |
|                                                        | >2                       | 0                  | 8 (100)       | 8     |         |
| History of at least one symptom suggestive of COVID-19 | Yes                      | 5 (71.4)           | 2 (28.6)      | 7     | 0.000*  |
|                                                        | No                       | 58 (11.6)          | 444 (88.4)    | 502   |         |

255 \*significant p value

256 **Discussion**

257 Our study revealed that a large proportion of the rural population remains susceptible to  
258 infection and far from reaching the seroprevalence required for herd immunity. A serosurvey  
259 from Karnataka during the same period (3- 16 September) has reported a slightly higher  
260 seroprevalence of 15.2% in the same district [21]. The variation can be attributed to samples  
261 collected from multiple settings, including hospital settings and among the high-risk group.

262 The low prevalence in this rural district is in contrast to an earlier study by the same  
263 investigators that was conducted in a dense urban slum in Bangalore City, which showed a  
264 seroprevalence of 57%.[9] This is expected as the participants in the current study, lived in  
265 sparsely populated villages, in well-ventilated houses and with the privilege of less polluted  
266 air. When the government-imposed lockdown, the adequacy of minimal resources for  
267 sustenance and the self-reliance of the villages, reduced travel to cities a minimum. These  
268 factors would have limited the spread of the infection.

269 Our study estimated that there were 5 to 9 undetected infected individuals for every RT-PCR  
270 confirmed case. This shows that most of the infections were picked up the existing testing  
271 infrastructure. CIR in Bangalore rural district was close to reported estimates of Bangalore city  
272 (1.10), can be accounted to its proximity to the city [21]. CIR reported in this study, is much  
273 lower than other studies in the western countries, probably due to high testing rate in India  
274 during recent months [8,18]. However, slums from Bangalore city reported a high CIR of 1:195  
275 as compared to rural counterparts. Poor health infrastructure and high prevalence of stigma  
276 leading to underreporting may be the reason for high CIR in slums.[9]

277 We found age and comorbidities were not significantly associated with seropositivity. Though  
278 advanced age and comorbidities are associated with severe illness, there is limited data  
279 regarding increased COVID-19 susceptibility with mild asymptomatic cases [22]. The  
280 hospital-based study from Srinagar found that people between the age group of 30-69 years

281 had higher odds of being seropositive (IgG) as compared to the younger population, but they  
282 did not find any gender difference in seropositivity [10]. However, the nationwide survey  
283 showed male gender was significantly associated with seropositivity than females [8]. Age and  
284 gender have a profound influence on mobility and is varied across cultures. Hence the  
285 susceptibility to infection can be attributed to the function of mobility rather than age and  
286 gender per se.

287 Though diabetes has been associated with increased mortality in COVID-19, the susceptibility  
288 to the infection may be same as the general population [23]. The same was reflected in our  
289 study. Though rural, this population had access to diagnosis and treatment of common  
290 comorbidities due to the outreach of the public-spirited hospital and the government health  
291 system. Access to chronic medications was facilitated even during the lockdown and intense  
292 resource reallocation following COVID-19, through our grass-root health workers who  
293 delivered medicines at home for people with chronic diseases to keep their diseases under  
294 control. We could imply that the efforts to sensitise the public regarding COVID-19 by the  
295 government and private sectors in sensitisation have played a valuable role.

296 We estimated an IFR of 12.8 per 10000 infections or 0.13%, which is comparable to what is  
297 reported from the Indian subcontinent (0.27-1.03) and other countries like USA (0.12-0.2%)  
298 Iran (0.08-0.12%), Brazil and Spain (1%) [8,21,24]. Estimating IFR is a challenge as it will  
299 depend on infection rate (seroprevalence) and the robustness of system capturing mortality.  
300 Both variables have estimation challenges of varying degrees in different parts of India. Since  
301 there are only a handful of studies estimating seroprevalence, we have only limited studies to  
302 compare. IFR reported in a study conducted in a Bangalore slum during the same period was  
303 absurdly low (0.03%), which can be attributed to under-reporting of deaths rather than reduced  
304 fatality in urban slums [9].

305 We could draw several implications from the findings of the study. First and foremost, rural  
306 areas succeeded in halting the spread of infection to a greater extent as compared to cities.  
307 However, rural areas are challenged by the poor health system and low cash economy,  
308 distancing itself from urbanisation reaped overall health benefits to people in villages, in terms  
309 of the number of infections. This is a reminder that guarded urbanisation preserving the natural  
310 ecosystem is an essential determinant of health.

311 Secondly, strict containment strategies like lockdown curbed infection without profound  
312 livelihood implication **in this rural setting**. This was possible because of the strength of the  
313 local economy and reduced inequities. The villages had enough seasonal grains (ragi, a millet),  
314 homegrown vegetables and dairy products for nourishment. Since the population density was  
315 less, there was enough water for the increased demand for handwashing, clean air to breathe,  
316 and physical distancing was a practical possibility. Strong social connections, a powerful rural  
317 disposition added value during COVID-19 infections. Neighbourhoods took care of infected  
318 households with food and essential medicines and arranged for a referral if they need hospital  
319 support.

320 Thirdly, low seroprevalence should be looked in two ways. One way to look at this  
321 'achievement', success in preventing the spread and the other way to look at it as 'responsibility'  
322 due to susceptibility. Since we assume that other villages in India have similar or a slightly  
323 lesser seroprevalence, we need to keep in mind 'huge susceptible burden' as 68.84% of India's  
324 population live in villages according to the census (2011) [25]. This has potential to staggering  
325 peaks and gives a warning signal for policymakers about the possibilities of multiple waves of  
326 the pandemic. In this context, discussion on sustaining safety measures and access to  
327 vaccination is of paramount importance.

328 The study has potential biases. Though all the subdistricts were selected, and subsequently  
329 villages were randomly selected, we employed convenience sampling at the village level.  
330 Villages were apprehensive about the medical team from the city, and hence we enrolled based  
331 on individual preference. This would have resulted in selection bias; however, we tried to  
332 reduce the bias by calculating age-gender adjusted seroprevalence. Another possibility is the  
333 occurrence of measurement bias in estimating seroprevalence. Since we have not done RT-  
334 PCR, we would have missed the current infection and underestimated the prevalence.  
335 Measurement bias can also be due to validity parameters of the test, which we have addressed  
336 through test performance adjusted seroprevalence.

337 There are many strengths to this study. This is one of the earliest population-based  
338 seroprevalence study conducted in a rural district of India harbouring a million people. This  
339 contributes to the body of evidence regarding the virus, its spread and the future implications  
340 in the rural context. The study being conducted by researchers who knows the population  
341 closely is an added advantage as the results are discussed in relation to the contextual realities.

342 This study has a few limitations. We did not follow a strict probability sampling technique due  
343 to feasibility reasons. Another limitation is that we did not estimate the current infection using  
344 RT-PCR. Both these aspects have an effect on the true estimation of seroprevalence in this  
345 community. **Though a 15 days recall period is generally recommended for eliciting morbidity,**  
346 **we have used a longer (3 months) recall. Our assumption was that people would recall their**  
347 **symptoms related to COVID for a longer period due to the unusually significant nature of this**  
348 **pandemic and the attention it had received from media.** However, this could have resulted in  
349 recall bias. Another limitation is that we have limited our research to one rural district; hence  
350 the generalisation of the findings has to be done with caution.

## 351 **Conclusion**

352 We found a low seroprevalence of COVID-19 infection among rural population in a district of  
353 South India, six months after the index case. The age-old public health measures of low  
354 population density, good housing, adequate ventilation, hygiene measures combined with the  
355 public, private and local health leadership limited the spread of an infectious respiratory viral  
356 pathogen in this low resource setting. Since more than three fourth of the rural population  
357 remains susceptible to COVID-19, sustaining public health measures and promoting access to  
358 vaccination is of utmost importance to safeguard the health this population as severe COVID-  
359 19 can be overtly burdensome owing to poor tertiary healthcare landscape of the rural setting.

## 360 **References**

- 361 1. WHO characterizes COVID-19 as Pandemic [Internet] 2019 Mar 11 [cited on 2020  
362 Dec 16]; Available from: [https://www.who.int/emergencies/diseases/novel-](https://www.who.int/emergencies/diseases/novel-coronavirus-2019/events-as-they-happen)  
363 [coronavirus-2019/events-as-they-happen](https://www.who.int/emergencies/diseases/novel-coronavirus-2019/events-as-they-happen)
- 364 2. WHO Coronavirus Disease (COVID-19) Dashboard [Internet]. 2020 Nov 26 [Cited  
365 on 2020 Nov 26]; Available from: <https://covid19.who.int>
- 366 3. WHO Indian situation [Internet]. 2020 Nov 26 [Cited on 2020 Nov 26]; Available  
367 from: <https://covid19.who.int/region/searo/country/in>
- 368 4. Karnataka Covid-19 Dashboard [Internet].2020 Nov 26 [Cited on 2020 Nov 26];  
369 Available from: <https://covid19.karnataka.gov.in/covid-dashboard/dashboard.html>
- 370 5. Yanes-Lane M, Winters N, Fregonese F, Bastos M, Perlman-Arrow S, Campbell JR et  
371 al. Proportion of asymptomatic infection among COVID-19 positive persons and their  
372 transmission potential: A systematic review and meta-analysis. PLoS One. 2020 Nov  
373 3;15(11):e0241536
- 374 6. Gao Z, Xu Y, Sun C, Wang X, Guo Y, Qiu S, et al. A Systematic Review of  
375 Asymptomatic Infections with COVID-19. J Microbiol Immunol Infect. 2020 15  
376 May;1-6
- 377 7. World Health Organization. Coordinated global research roadmap: 2019 novel  
378 coronavirus; March 2020. Geneva: WHO; 2020.
- 379 8. Murhekar MV, Bhatnagar T, Selvaraju S, Rade K, Saravanakumar V, Vivian  
380 Thangaraj JW, et al. Prevalence of SARS-CoV-2 infection in India: Findings from the  
381 national serosurvey, May-June 2020. Indian J Med Res. 2020 Aug;152(1 & 2):48–60.

- 382 9. George CE, Inbaraj LR, Chandrasingh S, de Witte LP. High seroprevalence of  
383 COVID-19 infection in a large slum in South India; what does it tell us about  
384 managing a pandemic and beyond? *Epidemiol Infect.* 2021;149:e39
- 385 10. Khan SMS, Qurieshi MA, Haq I, Majid S, Bhat AA, Nabi S, et al. Seroprevalence of  
386 SARS-CoV-2 specific IgG antibodies in District Srinagar, northern India - A cross-  
387 sectional study. *PLoS One.* 2020;15(11):e0239303.
- 388 11. Bangalore rural district demography [Internet]. [cited on 2020 Dec 16]; Available  
389 from: <https://bangalorerural.nic.in/en/demography/>
- 390 12. Bangalore Rural district [Internet]. [Cited on 2020 16 December]; Available from:  
391 [https://en.wikipedia.org/wiki/Bangalore\\_Rural\\_district](https://en.wikipedia.org/wiki/Bangalore_Rural_district)
- 392 13. Population-based age-stratified seroepidemiological investigation protocol for  
393 coronavirus 2019 (COVID-19) infection [Internet]. 2020 May 26 [Cited on 2020 Dec  
394 16]; Available from: [https://www.who.int/publications/i/item/WHO-2019-nCoV-  
395 Seroepidemiology-2020.2](https://www.who.int/publications/i/item/WHO-2019-nCoV-Seroepidemiology-2020.2)
- 396 14. Malani A, Shah D, Kang G, Lobo GN, Shastri J, Mohanan M, et al. Seroprevalence of  
397 SARS-CoV-2 in slums versus non-slums in Mumbai, India. *Lancet Glob Health.* 2020  
398 Nov 13;
- 399 15. Elecsys Anti-SARS-CoV-2 [Internet]. [Cited on 2020 Dec 16]; Available from:  
400 <https://www.fda.gov/media/137605/download>
- 401 16. National SARS-CoV-2 Serology Assay Evaluation Group. Performance  
402 characteristics of five immunoassays for SARS-CoV-2: a head-to-head benchmark  
403 comparison. *Lancet Infect Dis.* 2020;20(12):1390–400.
- 404 17. Sample Registration System (SRS) Bulletins [Internet]. [Cited on 2020 Dec  
405 16]; Available from:  
406 [https://censusindia.gov.in/vital\\_statistics/SRS\\_Bulletins/Bulletins.html](https://censusindia.gov.in/vital_statistics/SRS_Bulletins/Bulletins.html)
- 407 18. Zhao J, Yuan Q, Wang H, Liu W, Liao X, Su Yet al. Antibody Responses to SARS-  
408 CoV-2 in Patients With Novel Coronavirus Disease 2019. *Clin Infect Dis.*  
409 2020;71(16):2027-2034
- 410 19. Long QX, Liu BZ, Deng HJ, Wu GC, Deng K, Chen YK, et al. Antibody responses to  
411 SARS-CoV-2 in patients with COVID-19. *Nature Medicine* 2020; 26: 845-8
- 412 20. Projected population of Karnataka 2012-2021, Directorate of Economics and  
413 Statistics Bangalore 2013 [Internet]. [Cited on 2020 16 December]; Available from:  
414 <https://des.kar.nic.in/docs/Projected%20Population%202012-2021.pdf>

- 415 21. Babu GR, Sundaresan R, Athreya S, Akhtar J, Pandey PK, Maroor SP et al. The  
416 burden of active infection and anti-SARS-CoV-2 IgG antibodies in the general  
417 population: Results from a statewide survey in Karnataka, India. medRxiv 2020. doi:  
418 <https://doi.org/10.1101/2020.12.04.20243949>
- 419 22. Vahidy FS, Nicolas JC, Meeks JR, Khan O, Pan A, Jones SL, et al. Racial and ethnic  
420 disparities in SARS-CoV-2 pandemic: analysis of a COVID-19 observational registry  
421 for a diverse US metropolitan population. *BMJ Open*. 2020 Aug 11;10(8):e039849.  
422 doi: 10.1136/bmjopen-2020-039849.
- 423 23. Hussain A, Bhowmik B, do Vale Moreira NC. COVID-19 and diabetes: Knowledge  
424 in progress. *Diabetes Res Clin Pract*. 2020;162:108142.  
425 doi:10.1016/j.diabres.2020.108142
- 426 24. Mallapaty S. How deadly is the coronavirus? Scientists are close to an answer.  
427 *Nature*. 2020 Jun;582(7813):467-468. doi: 10.1038/d41586-020-01738-2.
- 428 25. Office of the Registrar General & Census Commissioner, India, Villages By  
429 Population in English [Internet]. [cited on 2020 16 December]. Available  
430 from:[https://censusindia.gov.in/2011census/population\\_enumeration.html](https://censusindia.gov.in/2011census/population_enumeration.html)

431

## 432 **Availability of data and materials**

433 Available as a part of the manuscript in the supporting information (S.2)

## 434 **Funding**

435 Azim Premji Foundation, Bangalore, India

## 436 **Conflict of interest**

437 CEG, LRI, SC declare no conflict of interest

## 438 **Authors' contributions**



439 LRI contributed to the conception and design of work, acquisition, analysis and interpretation  
440 of data, and was the primary contributor to the draft paper and revisions. CEG contributed to  
441 the conception, study design, developed the study tool, supervised data collection, participated  
442 in analysis and interpretation, contributed to the writing of the article. SC contributed to the  
443 conception, supervised and validated the blood analysis. All authors revised the work for  
444 important intellectual content and agreed to be accountable for all aspects of the work. All  
445 authors read and approved the final manuscript.

## 446 **Acknowledgement**

447 We would like to thank Mr Tata Rao creating Epi-data for data collection, conducting  
448 preliminary analysis and his help with referencing, and data collection. We also acknowledge  
449 the support of Ms Sangeetha and Mr Prakash in their assistance in data collection. We would  
450 like to extend our thanks Dr Arun, Epidemiologist from Christian Medical College, Vellore for  
451 his help during statistical analysis. We are grateful for the support of people Bangalore rural  
452 district for their participation in the study.

## 453 **Supporting Information**

454 **S.1 Table Age- and gender-standardized seroprevalence.**

455

456 **S.2 File Data**

457

## **Response to the comments of the editor and reviewer**

We thank the editor and reviewer for taking the time and going through our manuscript (PONE-D-20-39600). We appreciate the constructive feedback received to improve the quality of the paper. We have addressed the points raised and submitted a revised version of the manuscript with highlights. We have given below our response to the comments

### **Editorial comments**

- 1. Please ensure that your manuscript meets PLOS ONE's style requirements, including those for file naming.**

We have formatted the article according to the journal requirement and made changes in the file names

- 2. Your ethics statement should only appear in the Methods section of your manuscript. If your ethics statement is written in any section besides the Methods, please move it to the Methods section and delete it from any other section.**

We have deleted the ethics statement from other section and kept it only in the methods section

- 3. You may seek permission from the original copyright holder of Figure 1 to publish the content specifically under the CC BY 4.0 license.**

We have obtained permission from the original copyright holder for Figure 1 and submitted

### **Reviewer's comments**

- 1. The manuscript is well written except for minor corrections and clarifications**

We are grateful for this feedback and appreciate the efforts in reviewing our manuscript

- 2. The results of association between different variables and seropositivity can be presented as a table**

Thank you for this comment. We have now presented this analysis as a new Table.3

- 3. What is the justification for selecting three months for symptom recall?**

We understand that we have used 3 months recall period even though a 15 days recall period is generally recommended for eliciting morbidity. We assumed that people would recall their symptoms related to COVID for a longer period due to the unusually significant nature of this pandemic and the attention it had received from media. However, this could have resulted in recall bias. We have mentioned this as one of the limitations (347-50, page 16). At the same time, we did not want to go beyond three months as people tend to forget minor symptoms.

**4. There are minor typos throughout the manuscript that need to be fixed**

We have gone through the manuscript carefully fixed all the typos.
